# Supplementary material for: SARS-CoV-2 infection and persistence throughout the human body and brain
Source: Research Square preprint supplement (doi:10.21203/rs.3.rs-1139035/v1), 2021-12-20
Supplement: Supplementary file 1 [file bfab1242e2e0175711ba5db8.xlsx]

## Sheet: ddPCR, sgRNA, & virus isolation
Patient	Tissue	ddPCR				sgRNA		Virus Isolation			--	Negative
		N1 copies/ng RNA	N2 copies/ng RNA	N1 copies/mL sample	N2 copies/mL sample	Cq	Conc. copies/µl	Undiluted	01:10:00			N/A
P1 (DOI: 25 d)	Proximal Trachea	0.0151575	0.0130382			--	--
	Primary Bronchus	0.0163756	0.0204413			--	--
	L Superior Lobe	--	--
	L Inferior Lobe	--	--			--	--
	R Superior Lobe	4.51633	4.95532			--	--
	R Middle Lobe	0.24404	0.217659			--	--
	R Inferior Lobe	0.0146871	0.0147267			--	--
	R Ventricle	--	--
	IV Septum	--	--
	L Ventricle	--	--
	Pericardium	--	--
	Mediastinal LN	0.0457885	0.0564636			--	--
	Spleen	--	--
	Minor Salivary Gland	--	--
	Ileum	--	0.00807785			--	--
	Liver	--	--
	L Kidney	--	--
	R Kidney	--	--
	Adrenal Gland (unspecified)	--	--
	Testis	--	--
	Skeletal Muscle	--	--
	Perimortem Plasma			--	--
	Vitreous Humor			--	--
P2 (DOI: 14 d)	Proximal Trachea	0.00619203	0.011631			--	--
	Distal Trachea	0.00942793	0.0167799			--	--
	L Bronchus	0.0431982	0.0429533			--	--
	R Bronchus	--	--
	L Superior Lobe	--	--
	L Inferior Lobe	--	--
	R Superior Lobe	--	--
	R Middle Lobe	0.165143	0.177528			--	--
	R Inferior Lobe	0.662703	0.697817			--	--
	R Ventricle	--	--
	IV Septum	--	--
	L Ventricle	--	--
	Pericardium	--	0.0171			--	--
	Mediastinal LN	0.0135852	0.0137586			--	--
	Spleen	--	--
	Ileum	--	--
	Colon	--	--
	Liver	--	--
	L Kidney	--	--
	R Kidney	--	--
	Thyroid	--	--
	Pancreas	--	--
	Skeletal Muscle	--	--
	Perimortem Plasma			--	--
	Vitreous Humor			--	--
P3 (DOI: 14 d)	Proximal Trachea	--	--
	Distal Trachea	--	--
	L Bronchus	--	--
	R Bronchus	--	--
	L Superior Lobe	--	--
	L Inferior Lobe	--	--
	R Superior Lobe	--	--
	R Middle Lobe	--	--
	R Inferior Lobe	--	--
	R Ventricle	--	--
	IV Septum	--	--
	L Ventricle	--	--
	Pericardium	--	--
	Mediastinal LN	--	--
	Mesenteric LN	--	--
	Spleen	--	--			--	--
	Appendix	--	--
	Ileum	0.000888665	--			--	--
	Colon	--	--
	Liver	--	--			--	--
	L Kidney	--	--
	R Kidney	--	--
	L Adrenal Gland	--	--
	R Adrenal Gland	--	--
	Thyroid	--	--
	Pancreas	--	--
	Testis	--	--
	Skeletal Muscle	--	--
	Choroid/Sclera	--	--
	Aqueous Humor			--	--
	Vitreous Humor			--	--
P4 (DOI: 18 d)	Proximal Trachea	--	--
	Distal Trachea	--	--
	L Bronchus	--	--
	R Bronchus	--	--
	L Superior Lobe	0.949468	0.811723			--	--
	L Middle Lobe	0.0996722	0.10833			--	--
	L Inferior Lobe	2.02295	1.86487			38.3	0.287697
	R Superior Lobe	0.533884	0.433356			--	--
	R Middle Lobe	5.69672	5.40584			37.83	0.399543
	R Inferior Lobe	--	--			--	--
	R Ventricle	--	--
	IV Septum	--	--
	L Ventricle	--	--
	Pericardium	--	--
	Aorta (unspecified)	--	--
	Mediastinal LN	0.0495012	0.0557199			--	--
	Spleen	--	--
	Minor Salivary Gland	--	--
	Ileum	--	--
	Colon	--	--
	Liver	--	--
	L Kidney	--	--
	R Kidney	--	0.034683			--	--
	Adrenal Gland (unspecified)	--	--
	Thyroid	--	--
	Pancreas	--	--
	Testis	--	--
	Skeletal Muscle	--	--
	Choroid/Sclera	--	--
	Aqueous Humor			--	--
	Vitreous Humor			--	--
P5 (DOI: 42 d)	Proximal Trachea	0.207078	0.182518			--	--
	Distal Trachea	--	--			--	--
	L Bronchus	0.0123626	0.0153628			--	--
	R Bronchus	0.12889	0.145351			--	--
	L Superior Lobe	--	--
	L Inferior Lobe	0.118946	0.0995691			--	--
	R Superior Lobe	0.299535	0.257355			--	--
	R Middle Lobe	--	--
	R Inferior Lobe	--	--
	R Ventricle	--	--
	IV Septum	--	--
	L Ventricle	--	--
	Pericardium	--	--
	Aorta (unspecified)	0.103672	0.189426			--	--
	Cervical LN	0.0415914	0.0415914			--	--
	Mediastinal LN	0.87174	0.971161			--	--
	Mesenteric LN	--	--
	Spleen	--	--
	Appendix	--	--
	Minor Salivary Gland	--	--
	Ileum	--	--
	Colon	--	--
	Liver	--	--
	L Kidney	--	--
	R Kidney	--	--
	R Adrenal Gland	--	--
	Thyroid	--	--
	Pancreas	--	--
	Testis	--	--
	Skeletal Muscle	--	--
	Sciatic Nerve	--	--
	Choroid/Sclera	--	--
	Perimortem Plasma			--	--
	Aqueous Humor			--	--
	Vitreous Humor			--	--
P6 (DOI: 19 d)	Proximal Trachea	--	0.0338911			--	--
	Distal Trachea	0.0583349	0.0352995			--	--
	L Superior Lobe	10.5035	8.7462			30.12	83.831
	L Inferior Lobe	2.46045	2.28634			32.49	16.1877
	R Superior Lobe	0.250706	0.214235			--	--
	R Middle Lobe	0.00491912	0.00610428			--	--
	R Inferior Lobe	1.34688	1.33081			--	--
	R Ventricle	--	--
	IV Septum	--	--
	L Ventricle	--	--
	Pericardium	--	--
	Mediastinal LN	0.0678448	0.0569956			--	--
	Spleen	--	--
	Appendix	--	--
	Ileum	--	--
	Colon	--	--
	Liver	0.00554766	--			--	--
	L Kidney	--	--
	R Kidney	--	--
	L Adrenal Gland	--	--
	R Adrenal Gland	--	--			--	--
	Thyroid	--	--
	Pancreas	--	--
	Testis	--	--			--	--
	Skeletal Muscle	--	--
	Sciatic Nerve	0.0095921	--			--	--
	Choroid/Sclera	--	--
	Perimortem Plasma			--	--
	Pleural Fluid			3692.54	2724.7	--	--
	Aqueous Humor			--	--
	Vitreous Humor			--	--
P7 (DOI: 7 d)	Proximal Trachea	71.9472	71.6459			27.96	358.523
	Distal Trachea	98.1459	93.9492			30.8	50.4387
	L Bronchus	107.346	106.94			27.2	604.756
	R Bronchus	94.5364	95.1009			27.97	357.05
	L Superior Lobe	1499.62	1420.35			23.85	6165.29
	L Inferior Lobe	2677.94	2609.27			22.97	11278.1
	R Superior Lobe	8499.81	7821.6			21.52	30890.5
	R Middle Lobe	3107.09	2979.15			21.61	28927.3
	R Inferior Lobe	434.15	408.493			24.42	4147.43
	R Ventricle	0.408862	0.336909			--	--
	IV Septum	0.280055	0.343189			--	--
	L Ventricle	0.115127	0.142221			--	--
	Pericardium	8.63952	7.83716			34.01	5.46135
	Cervical LN	1322.7	1232.72			23.41	8371.32
	Mediastinal LN	3.49031	3.56616			33.09	10.2783
	Mesenteric LN	0.0166495	0.0194941			--	--
	Spleen	0.137479	0.120352			--	--
	Appendix	0.567885	0.417552			--	--
	Submandibular Salivary Gland	0.682343	0.645641			--	--
	Ileum	0.0206159	--			--	--
	Colon	0.0519849	0.0458874			--	--
	Liver	0.00792215	0.0209168			--	--
	Transplant Kidney	0.122733	0.0974473			--	--
	L Adrenal Gland	0.0535453	0.0536404			--	--
	Thyroid	3.0895	2.85469			36.76	0.812572
	Pancreas	0.0538442	0.0396815			--	--
	Testis	1.867	1.8172			39.56	0.117562
	Skeletal Muscle	0.280314	0.291747			--	--
	Sciatic Nerve	0.424449	0.403306			--	--
	Choroid/Sclera	--	0.0183057			--	--
	Optic Nerve	0.147518	0.148664			--	--
	Perimortem Plasma			1994.69	2465.35	--	--
	Pleural Fluid			1.58778e+07	1.16426e+07	--	--
	Aqueous Humor			2802.09	1593.24	--	--
	Vitreous Humor			--	--
P8 (DOI: 24 d)	Proximal Trachea	0.0437054	0.044758			--	--
	Distal Trachea	0.0207425	0.0240371			--	--
	L Bronchus	0.0387003	0.0454611			--	--
	R Bronchus	0.251549	0.218522			--	--
	L Superior Lobe	1.24753	1.24759			--	--
	L Inferior Lobe	0.273854	0.318993			--	--
	R Superior Lobe	1.74597	1.62819			--	--
	R Middle Lobe	0.0616851	0.0412639			--	--
	R Inferior Lobe	--	0.0063486			--	--
	R Ventricle	--	--
	IV Septum	--	0.0213988			--	--
	L Ventricle	0.0384612	0.0257914			--	--
	Pericardium	--	--
	Mediastinal LN	0.678821	0.618542			--	--
	Mesenteric LN	0.0163637	0.0242068			--	--
	Spleen	0.00885971	0.00632305			--	--
	Appendix	0.00802547	--			--	--
	Parotid Salivary Gland	--	--
	Ileum	--	--
	Colon	0.0579429	0.0312427			--	--
	Liver	--	0.012364			--	--
	L Kidney	--	0.163881			--	--
	R Kidney	--	--
	L Adrenal Gland	--	--
	R Adrenal Gland	0.213583	0.177855			--	--
	Thyroid	--	--			--	--
	Pancreas	--	--
	Ovary	--	--			--	--
	Uterus	0.00644737	--			--	--
	Skeletal Muscle	--	--
	Subcutaneous Adipose	--	--
	Central Adipose	--	--
	Sciatic Nerve	--	0.0100468			--	--
	Perimortem Plasma			--	--
	Aqueous Humor			--	--
	Vitreous Humor			--	--
P9 (DOI: 66 d)	Proximal Trachea	--	0.00825028			--	--
	Distal Trachea	0.018135	0.0105926			--	--
	L Bronchus	--	0.00485319			--	--
	R Bronchus	0.0101095	0.00996697			--	--
	L Superior Lobe	--	--
	L Inferior Lobe	0.023475	0.0236232			--	--
	R Superior Lobe	0.00677787	0.00539351			--	--
	R Middle Lobe	0.0136794	0.00793264			--	--
	R Inferior Lobe	0.00943202	0.00786774			--	--
	R Ventricle	0.0522841	--			--	--
	IV Septum	--	--
	L Ventricle	--	--
	Pericardium	--	--
	Aorta (unspecified)	--	--
	Mediastinal LN	--	--			--	--
	Spleen	--	--
	Appendix	--	--
	Parotid Salivary Gland	--	--
	Ileum	0.1236	0.0851			--	--
	Colon	--	--
	Liver	--	--
	L Kidney	0.0115449	0.0238554			--	--
	R Kidney	0.0126019	0.00847851			--	--
	L Adrenal Gland	--	--
	R Adrenal Gland	--	--
	Pancreas	--	--
	Testis	--	--
	Skeletal Muscle	--	--
	Sciatic Nerve	--	--
	Perimortem Plasma			--	--
P10 (DOI: 29 d)	Proximal Trachea	--	--
	Distal Trachea	0.00930708	--			--	--
	L Bronchus	--	0.0224927			--	--
	R Bronchus	--	--
	L Superior Lobe	--	--
	L Inferior Lobe	0.073903	0.0786051			--	--
	R Superior Lobe	--	--
	R Middle Lobe	--	--
	R Inferior Lobe	--	--
	R Ventricle	--	--
	IV Septum	--	--
	L Ventricle	--	--
	Pericardium	--	0.0807845			--	--
	Aorta (unspecified)	--	--
	Vena Cava	--	--
	Cervical LN	--	--
	Vena Cava LN	--	--
	Mediastinal LN	0.0330529	0.0364004			--	--
	Spleen	--	--
	Minor Salivary Gland	--	--
	Parotid Salivary Gland	--	--			--	--
	Ileum	--	--
	Liver	--	--
	Gallbladder	--	--
	L Kidney	--	--
	R Kidney	--	--
	R Adrenal Gland	--	--
	Thyroid	--	--
	Pancreas	--	--
	Skeletal Muscle	--	--
	Sciatic Nerve	--	--
	Choroid/Sclera	--	--
	Optic Nerve	--	--
	Perimortem Plasma	--	--
	Aqueous Humor			--	--
	Vitreous Humor			--	--
P11 (DOI: 58 d)	Proximal Trachea	--	--
	Distal Trachea	--	--
	L Bronchus	--	--
	R Bronchus	--	0.0261			--	--
	L Superior Lobe	0.0139918	0.016325			--	--
	L Inferior Lobe	0.118587	0.132991			--	--
	R Superior Lobe	--	0.00617102			--	--
	R Middle Lobe	0.033335	0.0284149			--	--
	R Inferior Lobe	--	--
	R Ventricle	--	--
	IV Septum	--	--
	L Ventricle	--	--
	Pericardium	--	--
	Thoracic Aorta	--	--
	Abdominal Aorta	--	--
	Cervical LN	0.00724093	--			--	--
	Mediastinal LN	0.0657586	0.0672096			--	--
	Spleen	--	--
	Tonsils	0.00978122	0.00769818			--	--
	Appendix	--	--
	Minor Salivary Gland	--	--
	Submandibular Salivary Gland	--	--
	Parotid Salivary Gland	--	--
	Tongue	0.00850862	0.00675265			--	--
	Uvula	--	--
	Ileum	--	--
	Colon	--	--
	Liver	--	--
	L Kidney	--	--
	R Kidney	--	--
	L Adrenal Gland	--	--
	R Adrenal Gland	--	--
	Thyroid	--	--
	Pancreas	--	--
	Testis	--	--
	Skeletal Muscle	--	--
	Subcutaneous Adipose	--	--
	Central Adipose	--	--
	Sciatic Nerve	--	--
	Choroid/Sclera	--	--
	Optic Nerve	--	--
	Perimortem Plasma			--	--
	Aqueous Humor			--	--
	Vitreous Humor			--	--
P12 (DOI: 48 d)	Proximal Trachea	--	--
	Distal Trachea	0.0051	--			--	--
	L Bronchus	--	--
	R Bronchus	0.0127062	0.00873671			39.76	0.0129925
	L Superior Lobe	--	--
	L Inferior Lobe	0.0603	0.0415			--	--
	R Superior Lobe	0.7228	0.6023			--	--
	R Middle Lobe	0.1375	0.1096			--	--
	R Inferior Lobe	0.0074	0.0075			--	--
	R Ventricle	--	--
	IV Septum	--	--
	L Ventricle	--	--
	Pericardium	--	--
	Thoracic Aorta	--	--
	Abdominal Aorta	--	--
	Mesenteric LN	--	--
	Inguinal LN	--	--
	Spleen	--	--
	Appendix	--	--
	Minor Salivary Gland	--	--
	Ileum	--	--
	Colon	--	--
	Liver	--	0.0057			--	--
	L Kidney	--	--
	R Kidney	--	--
	L Adrenal Gland	--	--
	R Adrenal Gland	--	--
	Thyroid	--	--
	Pancreas	--	--
	Testis	--	--
	Skeletal Muscle	--	--
	Subcutaneous Adipose	--	--
	Central Adipose	--	--
	Sciatic Nerve	--	--
	Perimortem Plasma			--	--
P13 (DOI: 82 d)	Proximal Trachea	--	--
	Distal Trachea	--	--
	L Bronchus	--	--
	R Bronchus	--	--
	L Superior Lobe	0.0645	0.0815			--	--
	L Inferior Lobe	0.1335	0.1388			--	--
	R Superior Lobe	0.0256	0.0298			--	--
	R Middle Lobe	0.0067	--			--	--
	R Inferior Lobe	0.1738	0.1502			--	--
	R Ventricle	--	--
	IV Septum	--	--
	L Ventricle	--	--
	Pericardium	--	--
	Thoracic Aorta	--	--
	Abdominal Aorta	--	--
	Cervical LN	--	--
	Mediastinal LN	0.048	0.0603			--	--
	Spleen	--	--
	Appendix	--	--
	Minor Salivary Gland	--	--
	Parotid Salivary Gland	--	--
	Ileum	--	--
	Colon	--	--
	Liver	--	--
	L Kidney	--	--
	R Kidney	--	--
	L Adrenal Gland	--	--
	R Adrenal Gland	--	--
	Thyroid	--	--
	Pancreas	--	--
	Testis	--	--
	Skeletal Muscle	--	--
	Central Adipose	--	--
	Sciatic Nerve	--	--
	Choroid/Sclera	--	--
	Optic Nerve	--	--
	Perimortem Plasma			--	--
	Aqueous Humor			--	--
	Vitreous Humor			--	--
P14 (DOI: 16 d)	Proximal Trachea	--	--
	Distal Trachea	--	--
	L Superior Lobe	--	--
	L Inferior Lobe	--	--
	R Superior Lobe	--	--
	R Middle Lobe	--	--
	R Inferior Lobe	0.367894	0.20966			--	--
	R Ventricle	--	--
	IV Septum	--	--
	L Ventricle	--	0.029461			--	--
	Pericardium	--	--
	Thoracic Aorta	--	0.266192
	Abdominal Aorta	--	--
	Femoral Artery	--	--
	Mediastinal LN	--	--			--	--
	Spleen	--	--
	Appendix	--	--
	Minor Salivary Gland	--	--
	Parotid Salivary Gland	--	--
	Ileum	--	--
	Colon	--	--
	Liver	--	--
	L Kidney	--	--
	R Kidney	--	--
	L Adrenal Gland	--	--
	Thyroid	--	--
	Pancreas	--	--
	Testis	--	--
	Skeletal Muscle	--	--
	Subcutaneous Adipose	--	--
	Central Adipose	--	--
	Sciatic Nerve	--	--
	Choroid/Sclera	--	--
	Perimortem Plasma			--	--
	Aqueous Humor			--	--
	Vitreous Humor			--	--
P15 (DOI: 27 d)	Distal Trachea	0.0719736	0.0719736			--	--
	L Bronchus	0.0869607	0.064136			--	--
	L Superior Lobe	0.429665	0.175854			--	--
	L Inferior Lobe	0.959268	0.692103			--	--
	R Superior Lobe	13.1827	6.96121			36.14	0.0944742
	R Middle Lobe	0.303988	0.163151			--	--
	R Inferior Lobe	2.30024	1.22988			--	--
	R Ventricle	--	--
	IV Septum	--	0.103727			--	--
	L Ventricle	--	--
	Pericardium	0.31493	0.428854			--	--
	Thoracic Aorta	0.240315	0.337924			--	--
	Abdominal Aorta	--	--
	Bronchial LN	--	--
	Mesenteric LN	--	--
	Spleen	--	--
	Appendix	--	--
	Ileum	--	--
	Colon	--	--
	Liver	--	--
	L Kidney	--	--
	R Kidney	--	--
	L Adrenal Gland	--	--
	R Adrenal Gland	--	--
	Thyroid	--	--
	Pancreas	--	--
	Testis	--	--
	Skeletal Muscle	0.95	1.0161			--	--
	Sciatic Nerve	0.0185828	0.0245632			--	--
P16 (DOI: 8 d)	Proximal Trachea	19.44	21.5362			38.5	0.0110632
	Distal Trachea	60.4446	63.542			28.89	69.0611
	L Bronchus	277.661	164.41			24.59	3469.56
	R Bronchus	822.994	792.317			22.42	25076.2
	L Superior Lobe	5821.72	5971.55			21.03	88813.3
	L Inferior Lobe	1843.13	1799.54			22.96	15302.1
	R Superior Lobe	1016.01	1057.08			23.83	6915.35
	R Middle Lobe	3931.31	3566.37			20.52	140775
	R Inferior Lobe	2879.98	2924.74			23.94	6288.33
	R Ventricle	0.56248	0.562501			--	--
	IV Septum	0.92226	1.09001			--	--
	L Ventricle	1.01449	1.10418			--	--
	Pericardium	26.5607	27.4228			--	--
	Thoracic Aorta	3.209	3.38187			33.93	0.702315
	Abdominal Aorta	--	0.191521			--	--
	Vena Cava	1.85432	1.95327			--	--
	Cervical LN	5.8755	5.9986			32.14	3.60859
	Tracheal LN	26.1718	31.1655			29.88	28.0139
	Vena Cava LN	--	--
	Mediastinal LN	3.4368	3.7784			32.78	2.00835
	Spleen	0.2161	0.2352			--	--
	Appendix	--	0.0339			--	--
	Ileum	--	0.0956			--	--
	Colon	0.99	0.9419			36.06	0.101806
	Liver	0.0667	0.061			--	--
	L Kidney	0.2493	0.2519			--	--
	R Kidney	0.1616	0.1752			34.25	0.528788
	L Adrenal Gland	--	--
	R Adrenal Gland	0.3239	0.3685			--	--
	Thyroid	0.8067	0.8056			32.92	1.76738
	Pancreas	0.0116	0.0066			--	--
	Testis	0.0444	0.0673			--	--
	Skeletal Muscle	1.0332	1.0628			--	--
	Sciatic Nerve	0.406131	0.425762			--	--
	Perimortem Plasma			15431.6	11182.4	--	--
P17 (DOI: 14 d)	Proximal Trachea	--	--
	Distal Trachea	--	--
	L Bronchus	--	--
	R Bronchus	--	--
	L Superior Lobe	--	--
	L Inferior Lobe	0.0128593	0.0140485			--	--
	R Superior Lobe	--	--
	R Middle Lobe	--	--
	R Inferior Lobe	0.0123314	0.0150133			--	--
	R Ventricle	--	--
	IV Septum	--	--
	L Ventricle	--	--
	Pericardium	--	--
	Thoracic Aorta	--	--
	Abdominal Aorta	--	--
	Cervical LN	--	--
	Mediastinal LN	--	--
	Mesenteric LN	--	--
	Spleen	--	--
	Appendix	--	--
	Parotid Salivary Gland	--	--
	Duodenum	--	--
	Jejunum	--	--
	Ileum	--	--
	Colon	--	--
	Liver	--	--
	L Kidney	--	--			--	--
	R Kidney	--	--
	L Adrenal Gland	--	--
	R Adrenal Gland	--	--
	Thyroid	--	--
	Pancreas	--	--
	Testis	--	--
	Skeletal Muscle	--	--
	Sciatic Nerve	--	--
	Choroid/Sclera	--	--
	Optic Nerve	--	--
	Perimortem Plasma			--	--
	Aqueous Humor			--	--
	Vitreous Humor			--	--
P18 (DOI: 9 d)	Proximal Trachea	264.392	277.457			25.85	1474
	Distal Trachea	67.7506	81.3954			31.63	29.058
	L Bronchus	0.6136	0.6919			--	--
	R Bronchus	23.7278	26.456			--	--
	L Superior Lobe	397913	422016			14.44	3.438e+06
	L Inferior Lobe	23598.9	24294.6			17.61	399355
	R Superior Lobe	103712	101142			16.2	1.03856e+06
	R Middle Lobe	78182.2	80747.3			16.68	751163
	R Inferior Lobe	45029.5	43234.2			18.28	252263
	R Ventricle	206.501	210.737			27.71	417.808
	IV Septum	59.7187	60.7769			28.33	273.531
	L Ventricle	33.4136	38.5588			29.92	93.3006
	Pericardium	45.4529	52.5067			30.57	59.7634
	Thoracic Aorta	234.456	265.941			29.09	163.839
	Abdominal Aorta	150.03	168.535			27.26	566.907	-(0/2)	-(0/2)
	Mediastinal LN	1.8209	1.7466			33.95	6.04335
	Spleen	19.0259	19.6013			30.62	57.9788
	Minor Salivary Gland	5.38357	5.6808			--	--
	Parotid Salivary Gland	0.797166	0.751065			38.98	0.197778
	Duodenum	1.2268	1.554			--	--
	Ileum	0.496	0.5489			--	--
	Colon	0.8242	0.6247			--	--
	Liver	1.4177	1.567			33.92	6.17421
	L Kidney	1.2027	1.1904			33.34	9.11234
	R Kidney	7.8899	8.1385			35.76	1.76858
	L Adrenal Gland	5.9072	6.3217			29.5	124.264
	R Adrenal Gland	7.7122	7.9159			--	--
	Thyroid	83.7106	90.9421			29.37	135.711
	Pancreas	3.1959	3.3114			35.35	2.3243
	Ovary	0.0812	0.0998			--	--
	Skeletal Muscle	14.7509	16.0243			31.31	36.3363
	Sciatic Nerve	12.784	13.799			36.57	1.01573
	Choroid/Sclera	12.9698	13.9068			34.85	3.27721
	Optic Nerve	12.9329	13.6635			--	--
	Perimortem Plasma			27869.1	29711.1	--	--
	Aqueous Humor			--	--
	Vitreous Humor			384.501	382.502	38.29	0.315832
P19 (DOI: 7 d)	Proximal Trachea	403.618	323.036			20.08	146648
	Distal Trachea	445.26	413.105			20.61	51758.9
	L Bronchus	8732.06	6699.06			23.97	5299.92
	R Bronchus	597.06	597.06			19.37	253341
	L Superior Lobe	338.892	290.18			22.2	17583.6
	L Inferior Lobe	999.998	900.841			26.24	1130.68
	R Superior Lobe	391.781	308.974			23.26	12862.6
	R Middle Lobe	370.335	297.582			23.6	9966.15
	R Inferior Lobe	344.407	341.887			22.94	16420.2
	R Ventricle	63.1696	68.5235			26.6	995.783
	IV Septum	12.7982	13.2224			31.31	36.1167
	L Ventricle	20.474	21.9162			28.9	186.312
	Pericardium	325.76	313.235			25.12	2421.39
	Thoracic Aorta	260.916	253.032			26.82	847.083
	Abdominal Aorta	5.09605	5.04028			35.05	2.86334
	Cervical LN	3.9452	3.92369			32.22	13.5328
	Mediastinal LN	22.7351	20.898			27.96	353.217	+(2/2)	+(2/2)
	Spleen	172.632	176.26			24.91	3654.66
	Appendix	3.04599	3.1108			34.84	1.82397
	Minor Salivary Gland	5.64032	5.94833			31.66	20.7009
	Parotid Salivary Gland	0.16411	0.175081			--	--
	Duodenum	1.38967	1.4721			--	--
	Jejunum	4.94459	5.03901			38.54	0.107238
	Ileum	241.594	239.246			28.59	218.425
	Colon	--	--
	Liver	33.3505	34.2825			28.74	194.203
	L Kidney	9.61906	9.5861			32.44	11.4492
	R Kidney	0.29456	0.316287			--	--
	L Adrenal Gland	321.013	326.161			25.23	2860.23
	R Adrenal Gland	142.596	144.047			24.81	3920.28
	Thyroid	8.87565	8.73655			30.12	67.4268
	Pancreas	0.356299	0.364845			--	--
	Testis	1.07617	1.27865			--	--
	Skeletal Muscle	5.91589	5.8586			31.99	16.1568
	Sciatic Nerve	4.53592	5.63575			35.4	1.18103
	Optic Nerve	0.767891	0.830016			--	--
	Perimortem Plasma			2101.17	2372.66	--	--
	Aqueous Humor			--	--
	Vitreous Humor			--	--
P20 (DOI: 99 d)	Proximal Trachea	0.1324	0.1232			--	--
	Distal Trachea	1.477	1.3268			--	--
	L Bronchus	0.0432	0.0345			--	--
	R Bronchus	0.0727	0.0852			--	--
	L Superior Lobe	0.0239	0.0423			--	--
	L Inferior Lobe	0.1055	0.0985			--	--
	R Superior Lobe	0.0599	0.0449			--	--
	R Inferior Lobe	0.1554	0.1542			--	--
	R Ventricle	--	0.0140627			--	--
	IV Septum	--	--
	L Ventricle	--	0.0152316			--	--
	Pericardium	--	--
	Thoracic Aorta	--	0.0319482			--	--
	Abdominal Aorta	--	0.0146355			--	--
	Mediastinal LN	0.0706	0.0942			--	--
	Spleen	0.0424	0.0156			--	--
	Appendix	0.0214	--			35.51	1.09302
	Minor Salivary Gland	--	--			--	--
	Parotid Salivary Gland	--	--			--	--
	Ileum	--	--
	Colon	0.1339	0.0565			--	--
	Liver	--	--
	L Kidney	--	--
	R Kidney	0.0437	0.0228			--	--
	L Adrenal Gland	--	--
	Thyroid	--	--
	Pancreas	0.1397	0.121			--	--
	Testis	0.0966	0.0593			--	--
	Skeletal Muscle	0.1281	0.1256			--	--
	Sciatic Nerve	0.0611921	0.0977958			37.33	0.592837
	Iliac Nerve	0.0552225	0.0496802			--	--
	Choroid/Sclera	0.554524	0.618557			37.87	0.40778
	Optic Nerve	0.0766352	0.0877782			--	--
	Perimortem Plasma			--	--
	Aqueous Humor			--	--
	Vitreous Humor			--	--
P21 (DOI: 12 d)	Proximal Trachea	3.3688	3.9837			36.11	1.38732
	Distal Trachea	10.8465	12.4611			33.18	10.6589
	L Bronchus	10.0188	11.1358			--	--
	R Bronchus	10.811	11.6614			--	--
	L Superior Lobe	477.439	510.58			24.3	5113.97
	L Inferior Lobe	196.721	206.824			25.48	2254.7
	R Superior Lobe	231.995	245.075			25.76	1848.8
	R Middle Lobe	238.971	254.679			24.52	4389.59
	R Inferior Lobe	14.3235	14.4735			31.21	41.8814
	R Ventricle	0.627998	0.752475			--	--
	IV Septum	0.489525	0.694796			--	--
	L Ventricle	1.26942	1.39948			--	--
	Pericardium	0.494566	0.542806			--	--
	Abdominal Aorta	1.11609	1.09969			35.36	2.33424
	Mediastinal LN	0.4119	0.4737			--	--
	Spleen	0.0371	0.0469			--	--
	Appendix	--	--
	Minor Salivary Gland	0.233959	0.197616			--	--
	Duodenum	1.1172	1.1364			--	--
	Jejunum	--	--
	Ileum	0.084	0.1109			--	--
	Colon	0.7485	1.0467			--	--
	Liver	0.1182	0.1112			--	--
	L Kidney	0.1056	0.1345			--	--
	R Kidney	0.2567	0.2711			--	--
	L Adrenal Gland	0.198	0.2015			--	--
	R Adrenal Gland	0.2945	0.3647			--	--
	Thyroid	0.0184	0.0184			--	--
	Pancreas	0.0105	0.014			--	--
	Testis	0.0141	0.0128			--	--
	Skeletal Muscle	0.4213	0.4743			--	--
	Sciatic Nerve	1.7678	1.83958			--	--
	Perimortem Plasma			4446.62	4864.02	--	--
P22 (DOI: 4 d)	Proximal Trachea	0.319527	0.368017			--	--
	Distal Trachea	0.733866	0.830163			--	--
	L Bronchus	1.67061	2.13697			--	--
	R Bronchus	2.18073	2.387			--	--
	L Superior Lobe	37.3461	38.4686			28.02	334.304
	L Inferior Lobe	5.87395	6.16699			30.64	54.0073
	R Superior Lobe	282.096	304.954			24.31	4449.02
	R Middle Lobe	1143.88	1123.93			22.65	14095.3
	R Inferior Lobe	14.7832	16.1549			29.47	122.184
	R Ventricle	--	--
	IV Septum	--	--
	L Ventricle	--	0.0325			--	--
	Pericardium	0.1977	0.2217			--	--
	Thoracic Aorta	0.0392	0.0197			--	--
	Abdominal Aorta	0.0553	0.0715			--	--
	Carotid Body	--	--
	Carotid Artery	0.0253	0.036			--	--
	Mediastinal LN	0.453025	0.482228			33.79	6.9533
	Mesenteric LN	--	--
	Spleen	--	0.0050449			--	--
	Appendix	--	--
	Minor Salivary Gland	--	--
	Jejunum	--	--
	Ileum	--	--
	Colon	--	--
	Liver	--	--
	L Kidney	--	--
	R Kidney	--	--
	L Adrenal Gland	--	--
	R Adrenal Gland	--	--
	Thyroid	--	--
	Pancreas	0.0282479	0.0426442			--	--
	Testis	--	--
	Skeletal Muscle	0.237579	0.276467			--	--
	Sciatic Nerve	0.0275957	0.0456086			--	--
	Choroid/Sclera	--	--
	Cornea	--	--
	Lens	--	--
	Optic Nerve	--	--
	Perimortem Plasma			1685.9	1586.25	--	--
	Aqueous Humor			--	--
	Vitreous Humor			--	--
P23 (DOI: 23 d)	Proximal Trachea	0.0376488	0.0403245			--	--
	Distal Trachea	0.0149941	0.0184319			--	--
	L Bronchus	0.0241616	0.0269028			--	--
	R Bronchus	0.0901558	0.0948368			--	--
	L Superior Lobe	0.215551	0.190596			--	--
	L Inferior Lobe	0.316993	0.305667			--	--
	R Superior Lobe	1.38395	1.31033			--	--
	R Middle Lobe	0.180975	0.183976			--	--
	R Inferior Lobe	0.774883	0.657782			--	--
	R Ventricle	0.0092	0.0079			--	--
	IV Septum	--	0.0072			--	--
	L Ventricle	--	--
	Pericardium	--	--
	Thoracic Aorta	0.0218	0.0289			36.83	0.726228
	Abdominal Aorta	--	--
	Vena Cava	--	--
	Carotid Artery	--	--
	Cervical LN	--	--
	Bronchial LN	--	--
	Mediastinal LN	0.11408	0.0940837			--	--
	Mesenteric LN	--	--
	Spleen	--	--
	Tonsils	0.1724	0.1986			--	--
	Appendix	--	--
	Minor Salivary Gland	0.00585464	0.0092792			--	--
	Submandibular Salivary Gland	0.0046	0.0057			--	--
	Parotid Salivary Gland	--	--
	Tongue	--	--
	Uvula	0.0326	0.0313			--	--
	Duodenum	0.0177315	0.0114211			--	--
	Ileum	--	--
	Colon	0.0709182	0.0618391			--	--
	Liver	0.0246251	0.0286301			--	--
	L Kidney	--	--
	R Kidney	--	--
	L Adrenal Gland	--	--
	R Adrenal Gland	--	--
	Thyroid	--	--
	Pancreas	--	--
	Testis	--	--
	Skeletal Muscle	0.014032	0.0132576			--	--
	Splenic Nerve	--	--
	Choroid/Sclera	0.0662	--			--	--
	Cornea	--	--
	Lens	--	--
	Optic Nerve	--	--
	Perimortem Plasma			--	--
	Aqueous Humor			--	--
	Vitreous Humor			--	--
P24 (DOI: 12 d)	Proximal Trachea	667.51	646.693			30.06	144.426
	Distal Trachea	309.611	316.728			27.62	750.282
	L Bronchus	659.672	623			23.68	10796.9
	R Bronchus	61.6619	70.7295			29.08	279.377
	L Superior Lobe	144.405	142.49			25.92	2378.42
	L Inferior Lobe	350.739	356.888			25.17	3954.57
	R Superior Lobe	153.479	166.706			25.73	2705.42
	R Middle Lobe	6378.76	6217.66			19.55	176025
	R Inferior Lobe	8504.94	9336.37			19.56	175035
	R Ventricle	33.7443	38.0112			30.37	116.63
	IV Septum	3.94707	4.57169			31.18	67.6767
	L Ventricle	3.60223	4.19134			33.81	11.4482
	Pericardium	12.9806	12.9734			--	--
	Abdominal Aorta	6.65761	7.3434			35.08	4.85289
	Vena Cava	11.5348	12.888			33.54	13.7218
	Cervical LN	0.224747	0.23397			--	--
	Mediastinal LN	1.64325	1.60321			36.76	1.54946
	Mesenteric LN	4.52063	4.7576			34.58	6.77267
	Appendiceal LN	0.804617	0.828377			--	--
	Spleen	0.503052	0.515802			--	--
	Tonsils	0.403775	0.321517			--	--
	Appendix	0.449024	0.416611			--	--
	Minor Salivary gland	0.683306	0.818521			--	--
	Submandibular Salivary Gland	0.150969	0.181173			--	--
	Parotid Salivary Gland	0.693305	0.558592			--	--
	Tongue	3.61574	3.90053			32.66	24.8978
	Duodenum	0.1794	0.202394			--	--
	Jejunum	0.145714	0.242766			--	--
	Ileum	0.15029	0.182676			--	--
	Colon	--	0.0636079			--	--
	Liver	0.0815887	0.113716			--	--
	L Kidney	0.288105	0.335762			--	--
	R Kidney	1.26042	1.22751			--	--
	L Adrenal Gland	1.35737	1.55473			--	--
	R Adrenal Gland	0.427172	0.514111			--	--
	Thyroid	2.49943	2.81177			36.45	1.91334
	Pancreas	0.232302	0.222285			--	--
	Testis	0.678811	0.787438			--	--
	Skeletal Muscle	3.12336	3.01005			--	--
	Sciatic Nerve	0.535731	0.661776			--	--
	Choroid/Sclera	--	--
	Lens	--	0.485294			--	--
	Optic Nerve	7.35222	8.25275			--	--
	Perimortem Plasma			3910.63	2862.5	--	--
	Aqueous Humor			4382.21	3955.24	--	--
	Vitreous Humor			--	--
P25 (DOI: 9 d)	Proximal Trachea	0.395724	0.459238			--	--
	Distal Trachea	0.278917	0.360978			--	--
	L Bronchus	--	--
	R Bronchus	--	0.0715569			--	--
	L Superior Lobe	0.0149293	0.0149293			--	--
	L Inferior Lobe	2.40192	2.75172			34.51	5.379
	R Superior Lobe	0.00707602	0.00710231			--	--
	R Middle Lobe	2.52266	2.74984			--	--
	R Inferior Lobe	0.362076	0.422333			--	--
	R Ventricle	--	--
	IV Septum	0.0124251	0.00707977			--	--
	L Ventricle	--	--
	Pericardium	0.0222227	0.0285739			--	--
	Thoracic Aorta	--	0.0186698			--	--
	Abdominal Aorta	--	--
	Vena Cava	0.0342951	--			--	--
	Mediastinal LN	0.499918	0.59552			--	--
	Mesenteric LN	--	--
	Spleen	--	--
	Appendix	--	--
	Minor Salivary Gland	0.00573276	--			--	--
	Duodenum	--	--
	Jejunum	--	0.0238102			--	--
	Ileum	--	--
	Colon	--	--
	Liver	--	--
	L Kidney	--	--
	R Kidney	--	--
	L Adrenal Gland	--	--
	R Adrenal Gland	--	--
	Thyroid	--	--
	Pancreas	--	--
	Ovary	--	--
	Skeletal Muscle	--	--
	Sciatic Nerve	0.00971168	--			--	--
	Autonomic Nerve	0.00563563	0.00554028			--	--
	Choroid/Sclera	--	0.0683915			--	--
	Cornea	--	--
	Lens	0.0445577	--			--	--
	Optic Nerve	--	0.00883024			--	--
	Perimortem Plasma			--	--
	Aqueous Humor			--	--
	Vitreous Humor			--	--
P26 (DOI: 29 d)	Proximal Trachea	--	0.0533364			--	--
	Distal Trachea	0.0471015	0.0719361			--	--
	L Bronchus	0.0595102	0.0857346			--	--
	R Bronchus	0.117442	0.145283			--	--
	L Superior Lobe	3.06001	3.39194			--	--
	L Inferior Lobe	0.171913	0.213393			--	--
	R Superior Lobe	1.17728	1.34227			--	--
	R Middle Lobe	1.37098	1.57888			--	--
	R Inferior Lobe	0.230845	0.300086			--	--
	R Ventricle	0.133348	0.16706			--	--
	IV Septum	--	--
	L Ventricle	--	0.010078			--	--
	Pericardium	0.058738	--			--	--
	Abdominal Aorta	--	--
	Vena Cava	--	--
	Mediastinal LN	4.44566	5.39854			38.12	0.3981
	Mesenteric LN	0.12205	0.138675			--	--
	Spleen	--	--
	Appendix	--	--
	Minor Salivary gland	--	--
	Duodenum	--	--
	Jejunum	--	0.0115854			--	--
	Ileum	--	--
	Colon	--	--
	Liver	--	0.0165645			--	--
	L Kidney	0.0888356	0.093327			--	--
	R Kidney	0.0134526	0.0193711			--	--
	L Adrenal Gland	1.38322	1.27276			--	--
	R Adrenal Gland	--	--
	Thyroid	0.0513451	0.0570238			--	--
	Pancreas	0.0616848	0.0569571			--	--
	Testis	0.0322563	0.0421771			--	--
	Skeletal Muscle	0.058946	0.0542169			--	--
	Sciatic Nerve	--	--
	Phrenic Nerve	0.0564016	0.0607422			--	--
	Choroid/Sclera	--	0.0677818			--	--
	Cornea	--	--
	Lens	1.12325	1.23621			--	--
	Retina	--	--
	Optic Nerve	0.58608	0.573682			--	--
	Perimortem Plasma			--	--
	Aqueous Humor			--	2462.67	--	--
	Vitreous Humor			838.41	1331.17	--	--
P27 (DOI: 1 d)	Proximal Trachea	984.513	1018.91			24.54	5706.14
	Distal Trachea	1000.97	1008.85			25.83	2498.63
	L Bronchus	351.69	353.997			24.62	5433.69
	R Bronchus	295.199	301.127			26.18	1992.89
	L Superior Lobe	86649.9	84457			16.74	840216
	L Inferior Lobe	283569	292410			16.56	941522	+(2/2)	+(2/2)
	R Superior Lobe	49086.2	49106.3			17.55	605097
	R Middle Lobe	109987	112736			20.08	99243.8
	R Inferior Lobe	51085.5	50426.1			19.79	119393
	R Ventricle	32.1122	33.5114			28.04	608.729	+(1/2)	-(0/2)
	IV Septum	23.5045	24.7893			29.71	208.751
	L Ventricle	82.8459	85.8641			26.79	1348.97
	Pericardium	232.916	238.245			26.68	1449.89	-(0/2)	-(0/2)
	Thoracic Aorta	130.025	133.174			28.17	560.885
	Abdominal Aorta	68.8002	70.1927			29.59	225.955
	Mediastinal LN	306.98	383.483			26.13	2059.23
	Mesenteric LN	0.866636	0.893647			36.09	3.51643
	Spleen	0.290909	0.317017			--	--
	Ileum	0.0442195	0.045919			--	--
	Colon	1.37281	1.36134			--	--
	Liver	0.408074	0.446561			--	--
	L Kidney	2.05634	2.30972			33.92	14.167
	R Kidney	0.142168	0.0972026			--	--
	L Adrenal Gland	0.342402	0.328537			--	--
	R Adrenal Gland	1.54508	1.72681			39.86	0.315584
	Pancreas	11.245	11.9069			32.31	39.5418
	Ovary (Paratubal Tissue)	0.0720561	0.0893605			--	--
	Breast Tissue	1.25495	1.4892			--	--
	Skeletal Muscle	0.758685	0.758838			--	--
	Sciatic Nerve	19.7272	21.1228			32.09	45.645
	Choroid/Sclera	6.64767	6.82473			37.15	1.78967
	Cornea	22.4698	24.411			29.15	298.18
	Lens	0.894637	0.954894			--	--
	Retina	0.159856	0.122128			--	--
	Optic Nerve	1.2816	1.59603			--	--
	Lacrimal Gland	--	--
	Perimortem Plasma			118347	123106	32.51	34.8466	-(0/2)	-(0/2)
	Aqueous Humor			--	2643.24	--	--
	Vitreous Humor			--	--
P28 (DOI: 7 d)	Proximal Trachea	1.604	1.61938			--	--
	Distal Trachea	0.171086	0.191382			--	--
	L Bronchus	4.14663	4.39676			39.63	0.067469
	R Bronchus	3.37925	3.46293			34.47	2.84687
	L Superior Lobe	7.88246	8.5173			33.73	4.8593
	L Inferior Lobe	8.18362	8.81569			33.44	5.97511
	R Superior Lobe	5.50969	6.14139			32.39	12.7922
	R Middle Lobe	15.7464	16.5645			32.34	13.3333
	R Inferior Lobe	6.34131	6.51821			31.75	20.4223
	R Ventricle	1.87009	2.02701			--	--
	IV Septum	0.29116	0.491368			--	--
	L Ventricle	12.6992	13.6097			35.49	1.35523
	Pericardium	0.435037	0.466995			--	--
	Thoracic Aorta	0.569533	0.66223			33.3	6.62713
	Abdominal Aorta	2.15745	2.3205			34.08	3.76378
	Mediastinal LN	0.733454	0.745526			36.21	0.801202
	Mesenteric LN	--	--
	Spleen	--	--
	Thymus	0.0493565	0.042863			--	--
	Appendix	--	--
	Minor Salivary Gland	--	--
	Duodenum	--	--
	Jejunum	--	--
	Ileum	--	--
	Colon	0.282171	0.365283			--	--
	Liver	--	--
	L Kidney	--	0.0799472			--	--
	R Kidney	--	--
	L Adrenal Gland	0.0203702	0.0221254			--	--
	R Adrenal Gland	0.0178732	0.020797			--	--
	Thyroid	--	--
	Pancreas	--	--
	Ovary	--	--
	Skeletal Muscle	0.767279	0.816117			--	--
	Sciatic Nerve	--	--
	Choroid/Sclera	2.81873	2.69944			35.86	1.0353
	Cornea	1.38253	1.43447			--	--
	Lens	3.32849	3.44458			35.25	1.60918
	Retina	1.61381	1.55668			--	--
	Perimortem Plasma			655.557	546.489	--	--
	Aqueous Humor			--	--
	Vitreous Humor			--	--
P29 (DOI: 204 d)	Proximal Trachea	0.0541831	--			--	--
	Distal Trachea	--	--
	L Bronchus	--	--
	R Bronchus	0.00971245	0.00647472			--	--
	L Superior Lobe	--	--
	L Inferior Lobe	0.023979	0.0209508			--	--
	R Superior Lobe	--	0.00843802			--	--
	R Inferior Lobe	0.0070508	--			--	--
	R Ventricle	--	--
	IV Septum	0.0162813	--			--	--
	L Ventricle	0.0298518	0.0220014			--	--
	Abdominal Aorta	--	--
	Tracheal LN	--	--
	R Bronchial LN	0.187745	0.0947589			--	--
	Spleen	--	--
	Appendix	--	0.0116292			--	--
	Minor Salivary Glands	0.113808	0.155619			--	--
	Duodenum	--	--
	Jejunum	--	0.0163028			--	--
	Ileum	--	--
	Colon	--	--
	Liver	--	--
	L Kidney	--	--
	R Kidney	--	--
	L Adrenal Gland	--	0.0186129			--	--
	R Adrenal Gland	--	--
	Thyroid	--	--
	Pancreas	--	--
	Testis	--	--
	Skeletal Muscle	--	--
	Skin	--	--
	Sciatic Nerve	--	--
	Choroid/Sclera	--	--
	Cornea	--	--
	Lens	--	0.00887868			--	--
	Retina	--	--
	Optic Nerve	--	--
	Perimortem Plasma			--	--
	Aqueous Humor			--	--
	Vitreous Humor			--	--
P30 (DOI: 15 d)	Proximal Trachea	0.042606	0.0620968			--	--
	Distal Trachea	0.398266	0.47336			--	--
	L Bronchus	0.342618	0.364387			--	--
	R Bronchus	1.67187	1.64136			--	--
	L Superior Lobe	29.1768	33.4678			31.41	17.7733
	L Inferior Lobe	205.982	205.851			28.27	206.336
	R Superior Lobe	249.71	253.913			28.03	249.699
	R Middle Lobe	278.055	280.499			27.42	400.59
	R Inferior Lobe	15.2241	13.9045			32.68	6.58862
	R Ventricle	0.166429	0.186018			--	--
	IV Septum	0.133367	0.115311			--	--
	L Ventricle	0.00999955	0.0174945			--	--
	Pericardium	0.878635	0.964776			--	--
	Thoracic Aorta	--	0.00848124			--	--
	Abdominal Aorta	--	--
	Vena Cava	0.0584937	0.0631315			--	--
	Carotid Artery	0.467566	0.417605			--	--
	Cervical LN	0.214463	0.221166			--	--
	Mediastinal LN	0.612018	0.628424			--	--
	Mesenteric LN	0.1043	0.0903562			--	--
	Spleen	--	--
	Minor Salivary Gland	0.0476237	0.0325644			--	--
	Tongue	0.0324648	0.0286839			--	--
	Jejunum	0.0211727	0.0124832			--	--
	Ileum	--	--
	Colon	--	--
	Liver	--	--
	L Kidney	0.0371756	0.0400193			--	--
	R Kidney	0.0912658	0.0893867			--	--
	L Adrenal Gland	0.087462	0.077214			--	--
	R Adrenal Gland	0.0682939	0.0393628			--	--
	Thyroid	0.0213076	0.028438			--	--
	Pancreas	0.0173733	0.0102379			--	--
	Skeletal Muscle	0.0551597	0.0933831			--	--
	Sciatic Nerve	0.0517014	0.0437068			--	--
	Perimortem Plasma			--	--
P31 (DOI: 18 d)	Proximal Trachea	--	0.00612162			--	--
	Distal Trachea	0.0790403	0.0583142			--	--
	L Bronchus	0.0295253	0.0485299			--	--
	R Bronchus	0.026094	0.0187578			--	--
	L Superior Lobe	1.62834	1.59004			--	--
	L Inferior Lobe	--	0.016451			--	--
	R Superior Lobe	0.0439432	0.0446443			--	--
	R Middle Lobe	0.0783952	0.0569462			--	--
	R Inferior Lobe	0.00831623	0.0102559			--	--
	R Ventricle	--	--
	IV Septum	--	--
	L Ventricle	--	--
	Pericardium	--	--
	Thoracic Aorta	--	0.0141109			--	--
	Abdominal Aorta	--	0.0181062			--	--
	Vena Cava	0.00846562	0.0119325			--	--
	Cervical LN	--	--
	Mediastinal LN	0.395464	0.462043			--	--
	Mesenteric LN	--	--
	Spleen	--	--
	Tonsils	0.00749159	--			--	--
	Appendix	--	--
	Minor Salivary Gland	--	--
	Submandibular Salivary Gland	0.0303717	0.0120825			--	--
	Tongue	--	--
	Duodenum	--	--
	Jejunum	0.00775598	0.00820144			--	--
	Ileum	--	--
	Colon	--	--
	Liver	--	--
	L Kidney	--	--
	R Kidney	--	--
	L Adrenal Gland	--	--
	R Adrenal Gland	--	--
	Thyroid	0.0934147	0.046102			--	--
	Pancreas	--	--
	Testis	--	--
	Skeletal Muscle	0.0139336	0.0160217			--	--
	Sciatic Nerve	--	--
	Choroid/Sclera	--	--
	Cornea	--	0.0110773			--	--
	Retina	--	--
	Optic Nerve	--	--
	Spinal Ganglia	--	--
	Perimortem Plasma			--	--
	Aqueous Humor			--	2584.04	--	--
	Vitreous Humor			--	--
P32 (DOI: 6 d)	Proximal Trachea	7070.35	7122.28			22.08	26122.5
	Distal Trachea	1226.05	1181.3			24.19	5005.32
	L Bronchus	16031.8	15312.5			21.44	42994.3	+(2/2)	+(1/2)
	R Bronchus	1492.25	1506.02			23.66	7613.43
	L Superior Lobe	268.526	258.606			23.38	9428.06
	L Inferior Lobe	8618.24	8639.8			20.98	61587.9
	R Superior Lobe	6953.05	7016.14			24.27	9376.48
	R Middle Lobe	384.942	422.139			25.85	1364.59
	R Inferior Lobe	1689.07	1645.09			22.34	21371.2
	R Ventricle	5.13548	5.04867			35.34	0.819992
	IV Septum	14.1727	15.2483			35.55	0.696126
	L Ventricle	4.95973	5.45253			33.56	3.29259
	Pericardium	674.675	650.056			25.79	1432.91
	Thoracic Aorta	37.2087	35.095			31.29	19.4612
	Abdominal Aorta	6.24148	6.69031			--	--
	Vena Cava	1.18267	1.16039			--	--
	Carotid Body	--	--
	Carotid Artery	14.7892	14.7425			33.04	8.1249
	Mediastinal LN	23.204	23.0044			30.62	44.6642
	Mesenteric LN	2.0752	2.16201			--	--
	Spleen	6.31508	7.54272			38.32	0.196716
	Minor Salivary Glands	2.60044	2.42141			34.56	2.7854
	Submandibular Salivary Gland	81.5006	82.3174			26.26	960.194
	Tongue	694.966	686.43			25.16	2074.29
	Uvula	31.8812	31.077			27.22	487.175
	Duodenum	19.5538	18.2955			31.47	24.5076
	Jejunum	598.265	560.624			27.44	416.888	- (0/2)	+(2/2)
	Ileum	61.6164	78.5984			--	--
	Colon	123.474	124.861			33.47	5.97455
	Liver	52.3438	50.289			27.4	422.102	-(0/2)	-(0/2)
	L Kidney	1.53408	1.24009			--	--
	R Kidney	10.5503	9.55372			--	--
	L Adrenal Gland	1.48316	1.45529			35.3	1.65843
	R Adrenal Gland	18.2093	18.3294			29.41	104.261	+(1/2)	-(0/2)
	Thyroid	30.4126	29.942			28.51	196.075	-(0/2)	-(0/2)
	Pancreas	81.6844	73.3047			31.56	23.0345
	Skeletal Muscle	11.6129	11.9835			33.38	6.39936
	Skin	1.59263	1.52536			--	--
	Sciatic Nerve	5.7468	5.42144			--	--
	Choroid/Sclera	1605.3	1420.32			25.31	1871.99	+(1/2)	+(1/2)
	Cornea	23.829	22.382			33.5	5.86054
	Lens	0.219243	0.229623			--	--
	Retina	16.4867	15.939			--	--
	Optic Nerve	52.4397	50.4605			34.44	3.02371
	Perimortem Plasma			225.237	307.568	--	--
	Aqueous Humor			626617	615568	--	--
	Vitreous Humor			490.952	858.923	--	--
P33 (DOI: 76 d)	Proximal Trachea	7.77233	5.00848			--	--
	Distal Trachea	0.205664	0.189273			--	--
	L Bronchus	--	--
	R Bronchus	--	--
	L Superior Lobe	5.86776	5.15663			36.6	0.66163
	L Inferior Lobe	17.5754	17.1298			28.92	137.488	-(0/2)	-(0/2)
	R Superior Lobe	24.0567	18.0808			34.05	3.99319
	R Middle Lobe	--	--
	R Inferior Lobe	2.63368	2.51144			36.89	0.53842
	R Ventricle	14.3361	10.8319			--	--
	IV Septum	1.39409	1.26233			--	--
	L Ventricle	0.0456831	0.0436073			--	--
	Pericardium	--	--
	Thoracic Aorta	--	--
	Cervical LN	0.0332036	0.0269961			--	--
	Mediastinal LN	27.7178	26.2475			29.72	83.9612	- (0/2)	-(0/2)
	Spleen	0.0881644	0.0766093			--	--
	Appendix	--	--
	Minor Salivary Glands	22.1953	19.195			34.67	2.56803
	Submandibular Salivary Gland	--	--
	Parotid Salivary Gland	0.00700568	0.0191886			--	--
	Tongue	0.405317	0.410913			--	--
	Uvula	--	--
	Duodenum	--	--
	Jejunum	--	--
	Ileum	--	--
	Colon	--	--
	Liver	--	--
	L Kidney	0.0629589	0.0415721			--	--
	R Kidney	3.11489	2.82944			32.29	13.7436
	L Adrenal Gland	--	--
	R Adrenal Gland	0.0253003	0.00899593			--	--
	Thyroid	--	--
	Pancreas	--	--
	Testis	0.0155645	0.00881565			--	--
	Skeletal Muscle	--	--
	Skin	--	--
	Sciatic Nerve	0.0384859	0.0360599			--	--
	Choroid/Sclera	--	--
	Cornea	--	--
	Lens	--	--
	Retina	--	--
	Optic Nerve	--	--
	Cervical Spinal Cord	--	--
	Olfactory Nerve	--	--
	Basal Ganglia	--	--
	Frontal Lobe	--	--
	Parietal Lobe	--	--
	Temporal Lobe	--	--
	Occipital Lobe	--	--
	Midbrain	--	--
	Cerebellum	--	0.00958784			--	--
	Dentate Nucleus (Cerebellum)	--	--
	Thalamus	--	--
	Circle of Willis	--	--
	Perimortem Plasma			--	--
	Aqueous Humor			--	1476.15
	Vitreous Humor			--	--
P34 (DOI: 36 d)	Proximal Trachea	0.0287384	0.0456425			--	--
	Distal Trachea	0.00993465	0.0129119			--	--
	L Bronchus	--	0.0119463			--	--
	R Bronchus	0.0142807	0.0096646			--	--
	L Superior Lobe	0.577176	0.650132			--	--
	L Inferior Lobe	1.83903	2.12435			35.73	0.915119
	R Superior Lobe	3.11484	3.27074			--	--
	R Middle Lobe	0.0629113	0.0827288			--	--
	R Inferior Lobe	1.35918	1.46244			35.87	1.21501
	R Ventricle	0.0362669	0.0364742			--	--
	IV Septum	--	--
	L Ventricle	--	--
	Pericardium	0.0282877	0.0451286			--	--
	Thoracic Aorta	0.0314095	0.0439136			--	--
	Abdominal Aorta	--	--
	Mediastinal LN	0.182832	0.196059			--	--
	Spleen	--	--
	Appendix	--	--
	Duodenum	--	--
	Jejunum	--	--
	Ileum	--	--
	Colon	--	--
	Liver	--	--
	L Kidney	--	--
	R Kidney	--	--
	L Adrenal Gland	--	--
	R Adrenal Gland	--	--
	Thyroid	--	0.160538			--	--
	Pancreas	--	--
	Testis	--	--
	Skeletal Muscle	--	--
	Skin	--	--
	Sciatic Nerve	--	--
	Choroid/Sclera	--	--
	Cornea	--	--
	Lens	--	--
	Retina	--	--
	Optic Nerve	--	--
	Perimortem Plasma			--	--
	Vitreous Humor			--	--
P35 (DOI: 35 d)	Proximal Trachea	--	--
	Distal Trachea	0.00696136	--			--	--
	L Bronchus	0.0119181	0.0226424			--	--
	R Bronchus	--	0.00486443			--	--
	L Superior Lobe	0.0947487	0.0964671			--	--
	L Inferior Lobe	0.944341	1.04778			--	--
	R Superior Lobe	0.0778489	0.0887505			--	--
	R Middle Lobe	--	0.0133588			--	--
	R Inferior Lobe	0.192443	0.24694			--	--
	R Ventricle	--	--
	IV Septum	--	--
	L Ventricle	--	0.00548181			--	--
	Pericardium	--	--
	Thoracic Aorta	--	--
	Abdominal Aorta	--	--
	Cervical LN	--	--
	Bronchial LN	2.99971	3.20272			33.74	3.95316
	Mediastinal LN	7.41472	7.91282			31.91	15.2396
	Mesenteric LN	0.0149034	0.0223495			--	--
	Spleen	0.00608477	0.00608477			--	--
	Appendix	--	--
	Minor Salivary Glands	0.775544	0.802694			--	--
	Submandibular Salivary Gland	--	--
	Tongue	3.19773	3.26104			38.89	0.0898102
	Duodenum	--	--
	Jejunum	--	--
	Ileum	--	0.0180884			--	--
	Colon	--	0.0547188			--	--
	Liver	--	--
	L Kidney	--	--
	R Kidney	--	--
	L Adrenal Gland	--	--
	R Adrenal Gland	--	--
	Thyroid	--	--
	Pancreas	--	--
	Ovary	--	--
	Uterus	24.9065	23.5886			33.99	3.29203
	Skeletal Muscle	1621.59	1597.4			25.59	1598.27	-(0/2)	-(0/2)
	Sciatic Nerve	--	--
	Choroid/Sclera	--	--
	Cornea	--	--
	Lens	--	--
	Retina	--	--
	Optic Nerve	--	--
	Olfactory Nerve	--	--
	Basal Ganglia	--	--
	Frontal Lobe	--	--
	Parietal Lobe	--	--
	Temporal Lobe	--	--
	Occipital Lobe	--	--
	Medulla	--	--
	Midbrain	--	--
	Cerebellum	--	--
	Thalamus	--	--
	Basilar Artery	--	--
	Perimortem Plasma			--	--
	Aqueous Humor			--	--
	Vitreous Humor			--	--
P36 (DOI: 4 d)	Proximal Trachea	48.426	49.8695			28.47	191.6
	Distal Trachea	132.369	138.522			27.67	344.651
	L Bronchus	678.163	682.774			25.84	1324
	R Bronchus	161.842	155.902			27.36	433.907
	L Superior Lobe	13.3767	13.4567			30.68	37.6542
	L Inferior Lobe	742.019	774.427			24.03	5030.85
	R Superior Lobe	157.972	126.341			27.43	412.781
	R Middle Lobe	218.078	201.518			29.18	113.248
	R Inferior Lobe	40.7738	41.3984			30.41	46.0151
	R Ventricle	2.5225	2.64695			--	--
	IV Septum	2.18077	2.20358			34.82	1.7897
	L Ventricle	1.55893	1.5999			--	--
	Pericardium	1.65073	1.76379			30.2	61.3591
	Thoracic Aorta	6.34761	6.60663			29.2	125.326
	Abdominal Aorta	5.23835	5.38583			30.87	38.0619
	Bronchial LN	--	--
	Abdominal Aorta LN	0.108664	0.0926096			--	--
	Mediastinal LN	0.0546747	0.0586283			--	--
	Mesenteric LN	0.129409	0.122215			--	--
	Appendiceal LN	--	--
	Spleen	0.0278612	0.0293838			--	--
	Thymus	--	--
	Appendix	--	--
	Minor Salivary Gland	40.1323	38.0805			27.94	308.068
	Duodenum	0.104122	0.16736			--	--
	Jejunum	--	--
	Ileum	--	--
	Colon	0.0666537	0.0775497			--	--
	Liver	--	--
	L Kidney	--	--
	R Kidney	0.00816427	--			--	--
	L Adrenal Gland	0.0363079	0.0574103			38.45	0.169617
	R Adrenal Gland	--	0.11866			--	--
	Thyroid	0.326376	0.325169			--	--
	Pancreas	--	--
	Ovary	0.0117266	--			--	--
	Uterus	0.35201	0.353271			--	--
	Skeletal Muscle	1.54806	1.45373			37.26	0.398076
	Sciatic Nerve	3.71984	3.87328			39.15	0.116058
	Choroid/Sclera	20.2697	20.6155			33.5	4.74706
	Cornea	5.1486	5.08605			35.52	1.37169
	Lens	662.104	548.514			--	--
	Retina	3.75385	3.26826			--	--
	Optic Nerve	20.1412	20.438			32.48	13.9008
	Olfactory Nerve	--	--
	Basal Ganglia	--	--
	Frontal Lobe	--	--
	Parietal Lobe	--	--
	Temporal Lobe	0.00634571	0.0152072			--	--
	Occipital Lobe	9.65829	9.14869			38.55	0.177846
	Medulla	--	--
	Midbrain	0.0102475	0.012142			--	--
	Cerebellum	--	--
	Thalamus	0.136066	0.140579			--	--
	Dura Mater	66.187	57.021			31.4	22.1492	-(0/2)	-(0/2)
	Perimortem Plasma			--	--
	Aqueous Humor			--	--
	Vitreous Humor			--	--
P37 (DOI: 5 d)	Sinus Turbinate	32731.5	29794.9			21.02	51430.3	+(2/2)	+(2/2)
	Nasal Placode	343257	353302			15.96	1.59252e+06
	Proximal Trachea	11244.6	10984.3			22.04	20839.5
	Distal Trachea	13221	12045.5			20.61	57832.5
	L Bronchus	4041.86	4157.53			24.03	5021.96
	R Bronchus	15871.9	15249			20.12	82039.6
	L Superior Lobe	837.853	814.824			24.08	4841.79
	L Inferior Lobe	5063.81	5041.83			22.07	20336.6
	R Superior Lobe	507.935	514.222			24.55	3458.39
	R Middle Lobe	242.457	245.162			26.05	1184.52
	R Inferior Lobe	714.7	750.923			24.43	3773.1
	R Ventricle	672.545	616.848			25.14	2282.57
	IV Septum	47.0548	47.7127			28.56	198.21
	L Ventricle	164.264	175.862			27.75	352.631
	Pericardium	38.0744	39.1913			29.7	87.7478
	Thoracic Aorta	70.621	67.5373			27.31	484.956
	Abdominal Aorta	80.9845	94.6642			28.79	168.016
	Mediastinal LN	163.659	281.598			27.22	516.209
	Spleen	2.03704	2.08733			--	--
	Appendix	--	--
	Duodenum	189.687	196.28			--	--
	Jejunum	--	--
	Ileum	45.0048	51.5088			--	--
	Colon	1.0313	1.15328			--	--
	Liver	3.46233	4.02621			34.01	4.04249
	L Kidney	0.0466987	0.0433255			--	--
	R Kidney	1.07107	1.1374			--	--
	L Adrenal Gland	0.597163	0.679071			--	--
	R Adrenal Gland	8.28034	9.55635			--	--
	Thyroid	461.773	453.16			26.5	863.875	-(0/2)	-(0/2)
	Pancreas	1.62196	1.85024			--	--
	Testis	0.297102	0.435788			--	--
	Skeletal Muscle	426.332	438.745			27.79	342.007
	Skin	458.713	428.182			26.98	611.568
	Sciatic Nerve	19.4225	18.7078			37.83	0.298851
	Choroid/Sclera	64.7251	67.2617			28.95	149.617
	Cornea	38.4131	37.6876			30.06	67.6863
	Lens	1.66998	1.47938			33.81	4.68263
	Retina	11.0659	11.6966			31.04	33.6784
	Optic Nerve	74.0553	70.685			28.63	219.51	-(0/2)	-(0/2)
	Cervical Spinal Cord	0.493768	0.506173			--	--
	Olfactory Nerve	0.115414	0.109852			--	--
	Basal Ganglia	0.0542741	0.0646391			--	--
	Frontal Lobe	0.00889905	0.00905068			--	--
	Parietal Lobe	0.11978	0.127044			--	--
	Temporal Lobe	0.0122056	0.0110632			--	--
	Occipital Lobe	0.016873	0.012184			--	--
	Midbrain	0.138831	0.130987			--	--
	Cerebellum	0.0544181	0.0631585			--	--
	Hypothalamus	0.012091	0.011749			--	--
	Corpus Callosum	0.181899	0.199268			--	--
	Basilar Artery	0.030902	0.0178834			--	--
	Dura Mater	0.196176	0.180902			38.9	0.123022
	Perimortem Plasma			7758.36	7875.62	35.77	1.31316
	Pleural Fluid			552994	557809	31.83	22.1356
	Ascites			1788.64	1847.6	--	--
	Aqueous Humor			--	--
	Vitreous Humor			1980	1764.63	--	--
P38 (DOI: 13 d)	Sinus Turbinate	0.332963	0.362255			--	--
	Nasal Placode	0.112644	0.1515			--	--
	Proximal Trachea	4.90978	5.18095			32.84	9.30373
	Distal Trachea	1.5489	2.0358			--	--
	L Bronchus	0.145396	0.161226			--	--
	R Bronchus	1.22818	1.36491			36.22	0.833705
	L Superior Lobe	5.27302	5.73005			31.39	26.2449
	L Inferior Lobe	538.87	528.189			23.69	6419.78
	R Superior Lobe	122.043	124.009			26.5	861.309
	R Middle Lobe	2.34211	2.36966			33.79	10
	R Inferior Lobe	16.1085	15.9285			30.15	121.886
	R Ventricle	0.0504481	0.0662832			--	--
	IV Septum	0.0543925	0.0719917			--	--
	L Ventricle	0.0122063	0.00739498			--	--
	Pericardium	0.743382	0.844659			--	--
	Thoracic Aorta	0.0970508	0.0768544			--	--
	Abdominal Aorta	0.0130187	0.0130268			--	--
	Vena Cava	0.0149877	0.0190709			--	--
	Mediastinal LN	1.28209	1.51574			37.22	0.945525
	Mesenteric LN	0.0333286	0.0437582			--	--
	Spleen	0.0199645	0.015743			--	--
	Appendix	0.0574651	0.0574651			--	--
	Jejunum	0.141949	0.143834			--	--
	Ileum	--	--
	Colon	--	--
	Liver	0.0187502	0.0254935			--	--
	L Kidney	0.0511478	0.030666			--	--
	R Kidney	--	--
	L Adrenal Gland	0.153409	0.163985			--	--
	R Adrenal Gland	--	--
	Thyroid	0.606131	0.616175			--	--
	Pancreas	0.318994	0.287182			--	--
	Testis	0.0097732	0.00291065			--	--
	Skeletal Muscle	--	--
	Skin	0.0227958	0.0259125			--	--
	Sciatic Nerve	0.691483	0.620907			--	--
	Optic Nerve	0.0308041	0.0368398			--	--
	Cervical Spinal Cord	11.0138	11.1375			32.12	17.9735
	Olfactory Nerve	2.42338	2.26485			32.75	11.3935
	Frontal Lobe	0.742666	0.741152			--	--
	Parietal Lobe	2.96549	3.04481			--	--
	Temporal Lobe	0.283111	0.17869			--	--
	Occipital Lobe	1.16194	1.18761			--	--
	Midbrain	79.9366	64.247			31.94	20.3939
	Cerebellum	0.378931	0.359036			--	--
	Thalamus	620.754	605.176			25.25	2474.15	-(0/2)	-(0/2)
	Hypothalamus	453.171	414.572			25.68	1821.09	-(0/2)	-(0/2)
	Corpus Callosum	6.98643	6.44309			--	--
	Basilar Artery	1.21693	1.27328			--	--
	Dura Mater	0.0636898	0.0614864			--	--
	Perimortem Plasma			--	--
P39 (DOI: 31 d)	Proximal Trachea	0.240833	0.323565			--	--
	Distal Trachea	2.84122	3.09021			--	--
	L Bronchus	3.23121	3.66474			--	--
	R Bronchus	0.716589	0.786085			--	--
	L Superior Lobe	1.01472	1.10472			--	--
	L Inferior Lobe	1.79388	1.88132			34.25	3.47128
	R Superior Lobe	0.215185	0.238705			--	--
	R Inferior Lobe	0.440623	0.515537			--	--
	R Ventricle	--	0.162905			--	--
	IV Septum	0.13702	0.160811			--	--
	L Ventricle	0.0393703	0.0360496			--	--
	Pericardium	0.274025	0.466974			--	--
	Thoracic Aorta	18.7622	19.4746			37.11	0.708665
	Abdominal Aorta	0.0251654	0.0383053			--	--
	Vena Cava	--	--
	Carotid Body	--	--
	Carotid Artery	0.0280329	0.0397132			--	--
	Cervical LN	--	--
	Mediastinal LN	13.727	15.3466			34.6	4.50065
	Spleen	--	--
	Thymus	--	--
	Tonsils	--	--
	Appendix	--	--
	Minor Salivary Gland	--	0.00762461			--	--
	Submandibular Salivary Gland	--	0.00855191			--	--
	Parotid Salivary Gland	0.0214757	0.0198454			--	--
	Tongue	0.0417572	0.0570887			--	--
	Duodenum	--	--
	Jejunum	--	0.0213407			--	--
	Ileum	--	--
	Colon	--	--
	Liver	--	0.00614409
	L Kidney	--	--
	R Kidney	--	--
	L Adrenal Gland	--	0.00694722			--	--
	R Adrenal Gland	0.00868254	0.00692445			--	--
	Thyroid	0.0524031	0.0599898			--	--
	Pancreas	--	--
	Testis	--	0.00678792			--	--
	Skeletal Muscle	--	--
	Sciatic Nerve	0.812027	0.79813			--	--
	Vagus Nerve	3.52432	3.54293			--	--
	Choroid/Sclera	--	0.0142416
	Cornea	--	--
	Lens	--	--
	Retina	--	--
	Optic Nerve	0.490065	0.486672			--	--
	Cervical Spinal Cord	0.435978	0.452096			--	--
	Olfactory Nerve	0.280321	0.37207			--	--
	Basal Ganglia	0.510317	0.486993			--	--
	Frontal Lobe	0.909094	0.807716			--	--
	Parietal Lobe	1.01723	0.94431			--	--
	Temporal Lobe	0.15083	0.2324			--	--
	Occipital Lobe	0.615579	0.705539			--	--
	Medulla	0.271111	0.270351			--	--
	Midbrain	0.126358	0.148123			--	--
	Cerebellum	0.0678318	0.0973503			--	--
	Thalamus	0.707989	0.855831			--	--
	Basilar Artery	0.0055744	0.0055744			--	--
	Dura Mater	--	--
	Perimortem Plasma			--	--
P40 (DOI: 47 d)	Proximal Trachea	--	--
	Distal Trachea	0.0312475	0.0382022			--	--
	L Bronchus	--	0.0115391			--	--
	R Bronchus	--	0.168417			--	--
	L Superior Lobe	1.07124	1.1387			--	--
	L Inferior Lobe	0.327955	0.417532			--	--
	R Superior Lobe	--	--
	R Middle Lobe	--	--
	R Inferior Lobe	0.444755	0.56119			--	--
	R Ventricle	--	--
	IV Septum	--	--
	L Ventricle	0.00589384	0.0105503			--	--
	Pericardium	--	0.0114072			--	--
	Thoracic Aorta	--	0.0483511			--	--
	Abdominal Aorta	--	--
	Cervical LN	0.0211188	0.0191178			--	--
	Mediastinal LN	1.02589	1.3776			--	--
	Spleen	--	--
	Appendix	--	--
	Minor Salivary Gland	--	--
	Parotid Salivary Gland	--	--
	Duodenum	0.0125702	--			--	--
	Jejunum	--	--
	Ileum	--	--
	Colon	--	--
	Liver	--	0.006659			--	--
	Rectum	--	--
	L Kidney	--	--
	R Kidney	--	--
	L Adrenal Gland	--	--
	R Adrenal Gland	--	0.00898363			--	--
	Thyroid	--	--
	Pancreas	--	--
	Breast Tissue	--	--
	Skeletal Muscle	--	--
	Diaphragm	--	--
	Skin	--	--
	Sciatic Nerve	22.0221	20.0236			33.41	6.47286
	Vagus Nerve	0.341427	0.325688			--	--
	Choroid/Sclera	--	0.0178573			--	--
	Cornea	--	0.025999			--	--
	Lens	--	--
	Retina	--	--
	Optic Nerve	0.175057	0.12995			--	--
	Cervical Spinal Cord	0.136239	0.124523			--	--
	Olfactory Nerve	0.111579	0.0828356			--	--
	Basal Ganglia	4.56843	4.49839			--	--
	Frontal Lobe	1.35909	1.3673			--	--
	Parietal Lobe	1.32325	0.920958			--	--
	Temporal Lobe	0.187054	0.168555			--	--
	Occipital Lobe	1.16827	0.804293			--	--
	Cerebellum	0.0476712	0.0511675			--	--
	Thalamus	0.643475	0.520772			--	--
	Hypothalamus	13.0079	9.58226			--	--
	Corpus Callosum	0.029505	0.0320095			--	--
	Dura Mater	--	--
	Perimortem Plasma			--	--
	Aqueous Humor			--	--
	Vitreous Humor			--	597.236	--	--
P41 (DOI: 33 d)	Sinus Turbinate	0.0630503	0.0783608			--	--
	Nasal Placode	0.0377991	0.0144236			--	--
	Proximal Trachea	--	--
	Distal Trachea	--	0.00656025			--	--
	L Bronchus	0.0266131	0.0314575			--	--
	R Bronchus	0.0104463	0.00659397			--	--
	L Superior Lobe	0.0123507	0.0304689			--	--
	L Inferior Lobe	0.01512	0.0105932			--	--
	R Superior Lobe	0.0629848	0.0922655			--	--
	R Middle Lobe	0.0717584	0.111097			--	--
	R Inferior Lobe	0.0221214	0.0234951			--	--
	R Ventricle	--	--
	IV Septum	--	--
	L Ventricle	--	0.0093076			--	--
	Pericardium	--	--
	Thoracic Aorta	--	--
	Abdominal Aorta	--	--
	Vena Cava	--	--
	Carotid Artery	0.00826515	0.00539686			--	--
	Cervical LN	0.188785	0.223165			--	--
	Tracheal LN	0.150429	0.130204			--	--
	Bronchial LN	0.0428657	0.0620634			--	--
	Thoracic Aorta LN	0.0492454	0.0973543			--	--
	Mesenteric LN	0.0654592	0.0755883			--	--
	Spleen	--	--
	Parotid Salivary Gland	--	--
	Tongue	--	--
	Duodenum	--	--
	Jejunum	--	--
	Ileum	--	--
	Colon	--	--
	Liver	--	--
	L Kidney	--	--
	R Kidney	--	--
	L Adrenal Gland	--	--
	R Adrenal Gland	--	--
	Thyroid	--	--
	Pancreas	0.0147099	0.0189198			--	--
	Breast Tissue	--	0.0249448			--	--
	Skeletal Muscle	0.00663747	0.00443174			--	--
	Diaphragm	--	--
	Intercostal Muscle	--	0.00746437			--	--
	Skin	--	--
	Sciatic Nerve	0.0846621	0.070126			--	--
	Vagus Nerve	0.0905428	0.0758294			--	--
	Choroid/Sclera	--	0.0259157			--	--
	Cornea	--	--
	Retina	--	--
	Optic Nerve	0.0358994	0.0484755			--	--
	Cervical Spinal Cord	0.332746	0.312576			--	--
	Olfactory Nerve	0.0077	0.0052			--	--
	Frontal Lobe	0.043665	0.0408444			--	--
	Parietal Lobe	0.0167273	0.00791546			--	--
	Temporal Lobe	0.00968664	0.0052832			--	--
	Occipital Lobe	0.0348715	0.0334044			--	--
	Midbrain	0.255311	0.212422			--	--
	Cerebellum	0.0634955	0.100222			--	--
	Thalamus	0.0100717	0.00571295			--	--
	Hypothalamus	0.447601	0.372379			--	--
	Corpus Callosum	0.0105232	0.0106152			--	--
	Basilar Artery	--	0.024956			--	--
	Dura Mater	--	--
	Perimortem Plasma			--	--
	Aqueous Humor			--	--
	Vitreous Humor			--	--
P42 (DOI: 230 d)	Sinus Turbinate	0.574246	0.598243			--	--
	Nasal Placode	0.00873417	0.00753411			--	--
	Proximal Trachea	--	--
	Distal Trachea	0.0344662	--			--	--
	L Bronchus	0.00654426	0.0117684			--	--
	R Bronchus	--	--
	L Superior Lobe	0.0119528	0.0105929			--	--
	L Inferior Lobe	--	--
	R Superior Lobe	--	--
	R Middle Lobe	--	--
	R Inferior Lobe	--	--
	R Ventricle	--	0.00674657			--	--
	IV Septum	--	0.00547734			--	--
	L Ventricle	--	--
	Pericardium	--	0.00733794			--	--
	Thoracic Aorta	--	--
	Abdominal Aorta	--	--
	Tracheal LN	--	--
	Bronchial LN	--	--
	Mediastinal LN	--	--
	Mesenteric LN	--	--
	Spleen	--	--
	Appendix	--	--
	Minor Salivary Glands	--	--
	Tongue	--	--
	Jejunum	--	--
	Ileum	--	--
	Colon	--	--
	Rectum	--	--
	Liver	--	--
	L Kidney	--	--
	R Kidney	--	--
	L Adrenal Gland	--	--
	Thyroid	--	--
	Pancreas	--	--
	Testis	--	--
	Skeletal Muscle	--	--
	Diaphragm	--	--
	Intercostal Muscle	0.0118436	0.0199802			--	--
	Skin	--	--
	Sciatic Nerve	0.0218392	0.0241698			--	--
	Choroid/Sclera	--	0.00524909			--	--
	Cornea	--	--
	Lens	--	--
	Retina	--	--
	Optic Nerve	--	--
	Cervical Spinal Cord	0.0868429	0.0691357			--	--
	Olfactory Nerve	--	--
	Frontal Lobe	0.00789215	0.0142754			--	--
	Parietal Lobe	0.00867715	0.0111405			--	--
	Temporal Lobe	--	--
	Occipital Lobe	0.00365242	0.00487003			--	--
	Midbrain	0.00468353	0.00825392			--	--
	Cerebellum	0.010147	0.0128177			--	--
	Thalamus	--	0.00695531			--	--
	Hypothalamus	0.0109673	0.0181976			--	--
	Corpus Callosum	0.0147577	0.00488627			--	--
	Basilar Artery	--	0.0110863			--	--
	Dura Mater	--	--
	Perimortem Plasma			--	--
	Pleural Fluid			--	--
	Ascites			--	--
	Aqueous Humor			--	--
	Vitreous Humor			--	--
P43 (DOI: 18 d)	Sinus Turbinate	838.804	863.783			24.29	6828.27
	Nasal Placode	899.489	959.795			26.15	2137.11
	Proximal Trachea	3.18495	3.35574			33.14	17.1637
	Distal Trachea	5.49563	6.11428			33.59	12.5716
	L Bronchus	5.70586	6.15545			--	--
	R Bronchus	4.5649	4.69175			33.56	12.8377
	L Superior Lobe	29.6009	30.7828			30.98	76.2387
	L Inferior Lobe	119.371	124.17			28.68	371.278
	R Superior Lobe	164.195	173.246			27.17	1053.94
	R Middle Lobe	401.823	428.055			26.58	1587.35
	R Inferior Lobe	519.965	570.33			26.02	2326.78
	R Ventricle	0.435539	0.413489			--	--
	IV Septum	10.376	10.3976			--	--
	L Ventricle	0.309733	0.306638			--	--
	Pericardium	0.626227	0.643946			39.7	0.219769
	Thoracic Aorta	0.627122	0.699376			--	--
	Abdominal Aorta	0.0321877	0.0349978			--	--
	Carotid Body	2.71904	2.95923			36.49	2.02219
	Carotid Artery	27.9785	29.5174			33.03	22.0674
	Cervical LN	0.0115226	0.0282823			--	--
	Tracheal LN	0.305152	0.344915			--	--
	Mesenteric LN	--	--
	Spleen	0.0476877	0.0388255			--	--
	Appendix	--	0.00808577			--	--
	Minor Salivary Glands	9.15563	9.17519			--	--
	Submandibular Salivary Gland	0.066821	0.0702624			--	--
	Parotid Salivary Gland	0.636872	0.621784			--	--
	Tongue	33.3771	35.9165			31.12	82.5823
	Uvula	14.4153	14.9435			29.48	255.39
	Buccal Mucosa	1.33223	1.30309			--	--
	Esophagus	0.0221637	0.0178623			--	--
	Duodenum	1.87462	1.79748			36.46	2.05909
	Jejunum	0.0172422	0.020234			--	--
	Ileum	0.296538	0.291067			--	--
	Colon	0.147332	0.120893			--	--
	Rectum	0.0103963	0.00958912			--	--
	Liver	--	0.00689677			--	--
	L Kidney	--	--
	R Kidney	0.12334	0.0925457			--	--
	L Adrenal Gland	0.121315	--			--	--
	R Adrenal Gland	0.0284524	0.0416267			--	--
	Thyroid	0.0190492	0.0174784			--	--
	Pancreas	0.0310383	0.0225877			--	--
	Ovary	--	--
	Skeletal Muscle	0.189922	0.224837			--	--
	Diaphragm	0.0483693	0.0516282			--	--
	Intercostal Muscle	1.38669	1.46405			--	--
	Skin	3.84394	3.55737			--	--
	Sciatic Nerve	4.49849	4.6136			--	--
	Choroid/Sclera	0.0389484	0.0287291			--	--
	Cornea	0.0356911	0.0339778			--	--
	Lens	0.0443007	0.0435098			--	--
	Retina	0.00983569	--			--	--
	Optic Nerve	0.024285	0.0324229			--	--
	Cervical Spinal Cord	9.32004	9.10944			--	--
	Olfactory Nerve	0.0581769	0.0811572			--	--
	Basal Ganglia	0.044057	0.0390661			--	--
	Frontal Lobe	0.0104493	0.00815897			--	--
	Parietal Lobe	0.429744	0.458364			--	--
	Temporal Lobe	3.92183	4.1834			36.94	0.475166
	Occipital Lobe	0.0558568	0.0500298			--	--
	Midbrain/Brainstem	3.39252	3.48461			37.41	0.829554
	Cerebellum	0.0383343	0.0304975			--	--
	Thalamus	2.46868	2.513			--	--
	Hypothalamus	3.21523	3.43746			--	--
	Corpus Callosum	35.4361	36.8031			--	--
	Basilar Artery	0.00584836	0.00476453			--	--
	Dura Mater	--	--
	Perimortem Plasma			771.946	830.164	--	--
	Aqueous Humor			--	10307	--	--
	Vitreous Humor			--	--
P44 (DOI: 65 d)	Proximal Trachea	--	0.00599354			--	--
	Distal Trachea	0.05426	0.0514564			--	--
	L Superior Lobe	0.033529	0.0309434			--	--
	L Inferior Lobe	--	0.00703142
	R Superior Lobe	0.0398401	0.0288153			--	--
	R Middle Lobe	0.00631047	0.00785006			--	--
	R Inferior Lobe	0.03233	0.052421			--	--
	R Ventricle	--	--
	IV Septum	--	--
	L Ventricle	--	--
	Pericardium	--	--
	Cervical LN	0.385267	0.497405			--	--
	Mediastinal LN	0.361622	0.332348			--	--
	Mesenteric LN	--	--
	Spleen	--	--
	Thymus	--	--
	Appendix	0.00746433	0.0133413			--	--
	Minor Salivary Glands	--	--
	Parotid Salivary Gland	--	--
	Esophagus	--	--
	Duodenum	--	--
	Jejunum	0.00765629	0.015031			--	--
	Ileum	0.0649317	0.0650466			--	--
	Colon	0.0115489	0.0162178			--	--
	Rectum	--	--
	Liver	--	--
	L Kidney	--	--
	R Kidney	--	--
	L Adrenal Gland	0.0160421	0.0224097			--	--
	R Adrenal Gland	0.0214783	--			--	--
	Thyroid	0.0590421	0.0744507			--	--
	Pancreas	--	--
	Testis	--	--
	Skeletal Muscle	--	0.0200982			--	--
	Skin	0.0418044	0.0295225			--	--
	Sciatic Nerve	0.302722	0.418278			--	--
	Optic Nerve	--	0.0104742			--	--
	Cervical Spinal Cord	0.455434	0.474828			--	--
	Basal Ganglia	0.102184	0.0898558			--	--
	Frontal Lobe	0.00781975	0.00922521			--	--
	Parietal Lobe	0.00886969	0.00831113			--	--
	Temporal Lobe	0.461919	0.533932			--	--
	Occipital Lobe	0.0153664	0.0122744			--	--
	Midbrain/Brainstem	0.0214517	0.0199129			--	--
	Cerebellum	0.0100906	0.0166578			--	--
	Thalamus	1.24792	1.29499			--	--
	Hypothalamus	0.0315464	0.0446203			--	--
	Corpus Callosum	0.133497	0.167039			--	--
	Circle of Willis	--	--
	Dura Mater	--	--
	Perimortem Plasma			--	--
Cq/quantification cycle, ddPCR/droplet digital PCR, DOI/duration of illness, IV/interventricular, L/left, LN/lymph node, R/right, sgRNA/subgenomic RNA

## Sheet: Seroconversion Data
Patient ID	SARS-CoV-2 Antibodies
	Nuclsocapsid		Spike		DOI (days)				N/A
	IgG	IgM	IgG	IgM
P27	-	-	-	-	1	≤ 14
P22	+	+	+	-	4
P36	-	-	-	-	4
P37	-	-	-	-	5
P32	+		+		6
P7	+	+	-	-	7
P19	-	+	-	-	7
P28	+		+		7
P16	+	+	-	+	8
P18	-	+	-	-	9
P25	+	-	+	-	9
P21	+	+	+	+	12
P24	+	-	-	-	12
P38	+		+		13
P2	+	+	+	-	14
P3					14
P17	+	+	-	-	14
P30	+		+		15	15-30
P14	-	+	-	-	16
P4					18
P31	+		+		18
P43	+	-	-	-	18
P6	+	+	+	-	19
P23	+	+	+	-	23
P8	+	-	+	+	24
P1	+	-	+	-	25
P35	+		+		25
P15					27
P10	+	+	+	+	29
P26	+	+	+	+	29
P39	+		+		31	≥ 31
P41	+		+		33
P34	+		+		36
P5	+	+	+	-	42
P40	+		+		47
P12	+	-	+	-	48
P11	+	+	+	-	58
P44	+		+		65
P9	+	+	+	+	66
P33	+		+		76
P13	+	+	+	+	82
P20	+	+	+	+	99
P29	+		+		204
P42	+		+		230

## Sheet: ddPCR & sgRNA LOD validation
Patient	Tissue	Avg. ddPCR Positive Droplets/well		sgRNA Result			--	Negative
		N1	N2	Cq.	Conc. copies/µl			N/A
CP1	Brain	0	0	--	--
	Spinal Cord	0.5	0.5	--	--
	Heart	0	0.5	--	--
	Lung	0	0	--	--
CP2	R Kidney	0	0	--	--
CP3	Liver	0	0	--	--
CP4	R Kidney	0	0.5	--	--
CP5	Liver	0	0	--	--
CP6	Lung	0	0.5	--	--
CP7	Lung	0.5	0	--	--
CP8	Lung	0	0	--	--
CP9	Kidney	1	0	--	--
CP10	Liver	0	0.5
CP11	Nasal Placode	0	0	--	--
	Proximal Trachea	0	0
	Distal Trachea	0	0	--	--
	L Bronchus	0	0
	L Superior Lobe	0	0
	L Inferior Lobe	0	0
	R Superior Lobe	0	0
	R Middle Lobe	0	0
	R Inferior Lobe	0	0
	R Ventricle	0	0
	IV Septum	0	0
	L Ventricle	0	0
	Pericardium	0	0	--	--
	Thoracic Aorta	0	0
	Abdominal Aorta	0	0	--	--
	Vena Cava	0.5	0
	Carotid Artery	0	0
	Tracheal LN	0	0.5
	Mesenteric LN	0	0	--	--
	Spleen	0	0	--	--
	Thymus	0	0	--	--
	Minor Salivary Gland	0	0	--	--
	Esophagus	0	0	--	--
	Ileum	0	0.5	--	--
	Colon	0	0.5
	Rectum	0	0
	Liver	0	0
	L Kidney	0	0.5
	R Kidney	0	0.5
	L Adrenal Gland	0	0	--	--
	R Adrenal Gland	0	0.5
	Thyroid	0	0.5	--	--
	Pancreas	0	0	--	--
	Testes	0	0.5	--	--
	Skeletal Muscle	0	0	--	--
	Intercostal Muscle	0	0
	Skin	0	0	--	--
	Sciatic Nerve	0	0.5
	Choroid/Sclera	0	0.5	--	--
	Cornea	0	0.5	--	--
	Lens	0	0	--	--
	Retina	0	0	--	--
	Optic Nerve	0	0
	Cervical Spinal Cord	0	0
	Basal Ganglia	0	0
	Frontal Lobe	0	0.5
	Parietal Lobe	0	0
	Temporal Lobe	0	0
	Occipital Lobe	0	0
	Midbrain	0	0
	Cerebellum	0.5	0
	Thalamus	0	0
	Hypothalamus	0.5	0
	Corpus Callosum	0	0
	Basilar Artery	0	0.5
	Dura Mater	0	0.5	--	--
CP/control patient, Cq/quantification cycle, ddPCR/droplet digital PCR, IV/interventricular, L/left, LN/lymph node, R/right, sgRNA/subgenomic RNA
