# Supplementary material for: SARS-CoV-2 infection and persistence throughout the human body and brain
Source: Research Square preprint supplement (doi:10.21203/rs.3.rs-1139035/v1), 2021-12-20
Supplement: Supplementary file 2 [file d10d5304af8774e8127e4a89.xlsx]

## Sheet: Sheet1
		Lung Findings										Cardiac Findings					Hepatic Findings								Renal findings					Splenic findings					Lymph Node Findings
Research Pt #	Immediate Cause of Death	Left Lung wt (g)	Right Lung wt (g)	Lung wt (g)	DAD	Acute Pneum	Pulm Edema	Pulm Hem	Pulm Emb	Emphysema	Lung Comments	Heart Wt (g)	Myocard Infiltrate	Myocard Infarction/Necrosis	CAD>50%	Heart-Comments	Liver Wt (g)	Liver necrosis	Liver necrosis %	Steatosis	Steatohepatitis	Portal Inflammation	Fibrosis (NASH-CRN Stage)	Liver Comments	Left Kidney Wt (g)	Right Kidney Wt (g)	Acute Kidney Injury Changes	Diabetic Glomerulopathy	Kidney Comments	Spleen Wt (g)	Splenic Follicular hyperplasia	Splenic Lymphodepletion	Infarction	Red Pulp Congestion	Lymphodepletion	LN-Follicular hyperplasia	Paracortical hyperplasia	Plasmacytosis	Plasmablasts noted	Spleen/LN Comments	Brain Wt (g)	Central Nervous System Findings	Other findings related to COVID-19 or consequences of therapy	Other co-morbid findings
1	bacterial sepsis and fungal pneumonia			1600	Organizing	Present	Absent	Absent	Yes	Present	Organizing Thrombi	450	Absent	None	Present	Focal Chronic epicarditis	1650	None	0	0-None-minimal	Absent	1-Mild	0-None	Sinusoidal microthrombi	300	300	Present	Absent	Tubular microcalcs	100	Absent	Yes	Absent	Present	Present	Absent	Absent	Present	Present	Anthracotic lymph nodes				Left Leg above knee amputation, Bullous skin lesions
2	acute pyelonephritis with abscess and likely sepsis	300	400	700	Not found	Absent	Absent	Absent	No	Present		580	Absent	None	Absent		1500	None	0	0-None-minimal	Absent	1-Mild	1-PP or PSF	marked congestion	90	200	Absent	Absent	Acute pyelonephritis, Nephrolithiasis	280	Present	some, partial preserv	Absent	some	Absent	Present	Present	Present	Absent	Spleen, partial preservation white pulp, hemosiderin laden macrophages; possible lymph node infarction			Focal microscopic myocyte necrosis in psoas muscle section
3	lymphocytic myocarditis	1400	1300	2700	Not found	Absent	Present	Absent	No	Absent	Mild interstitial pneumonitis	460	Present	None	Absent	Lymphocytic myocarditis	1370	None	0	0-None-minimal	Absent	0-None-minimal	0-None	Lymphocytosis, Sinusoidal microthrombi	185	162	Present	Absent		200	Present	some, partial preserv	Absent	Absent	Absent	Present	Present	Absent	Absent	Spleen partial preserevation white pulp
4	DAD	1750	1800	3550	Organizing	Absent	Present	Absent	No	Present	Granulomatous inflammation	680	Absent	None	Absent		2350	None	0	1-Mild	Present	1-Mild	3-Bridging Fibrosis	marked autolysis	210	210	Absent	Absent	Arterionephrosclerosis	600	Present	some, partial preserv	Absent	Present	Absent	Present, regressed	Present	Absent	Absent	some preservation white pulp				Follicular adenoma
5	fungal pneumonia	1100	1200	2300	Fibrosing	Present	Present	Present	Yes	Absent	Fungal infection	650	Absent	Microscopic	Absent	Microinfarcts in septum	1900	Zonal	10	2-Moderate	Present	1-Mild	2-PP+PSF	Cholangiolar cholestasis	250	250	Absent	Absent		175	Present	some, partial preserv	Absent	some	Absent	Present, regressed	Present	Absent	Absent
6	acute bronchopneumonia	1800	1400	3200	Exudative	Present	Present	Absent	No	Absent		600	Absent	None	Absent		2550	None	0	0-None-minimal	Absent	1-Mild	1-PP or PSF	Sinusoidal dilation	310	290	Present	Absent	interstitial nephritis, small granulomas in medulla	230	Present	No	Absent	some	Absent	Present	Present	Present	Present				Focal microscopic myocitis in psoas muscle section	Adrenal adenoma
7	acute polymicrobial bronchopnemonia superimposed on DAD	650	780	1430	Exudative	Present	Present	Absent	No	Present	Interstitial calcifications	700	Absent	Large, fibrotic	Present	CABG, Old myocardial infarction	1000	Zonal	5	0-None-minimal	Absent	2-Moderate	3-Bridging Fibrosis	Multiple bile duct hamartomas	340	130	Present	Diffuse	arteriolar hyalinosis	206	Absent	Yes	Absent	some	Absent	Present	Present	Present	Present				Pancreatitis	Testicular atrophy
8	acute polymicrobial bronchopnemonia superimposed on DAD	950	1050	2000	Organizing	Present	Present	Absent	No	Absent	Pre-COVID lung fibrosis with honeycomb change	480	Absent	None	Absent	Focal epicardial fat necrosis	2250	None	0	1-Mild	Absent	1-Mild	0-None	Marked congestion, sinusoidal dilation	180	170	Absent	Absent	interstitial fibrosis	50	Absent	Yes	Absent	Present	Absent	Present	Present	Absent	Absent				Pancreatitis, mediastinal abscess	Pre-existing pulm fibrosis; Uterine leiomyoma
9	pneumonia and sepsis			1800	Organizing	Present	Present	Present	No	Absent	Left empyema, necrotizing bronchitis, abscesses	400	Absent	None	Absent	Bacterial overgrowth	2000	Zonal	60	0-None-minimal	Absent	1-Mild	0-None	Bacterial overgrowth	207	216	Absent	Absent	Bacterial overgrowth	327	Absent	Yes	Absent	Absent	Present	Absent	Absent	Present	Absent	Spleen with increased cellularity in red pulp				Bacterial overgrowth in multiple organs despite post-mortem interval < 1 day
10	sepsis			1600	Exudative	Absent	Present	Absent	No	Absent	bacterial colonies	370	Absent	None	Present	Bacterial overgrowth	1350							Marked autolysis; Sinusoidal microthrombi, bacterial overgrowth	149	138		Diffuse	severe interstitial fibrosis, glomerulosclerosis	103	Absent	Yes	Absent	Present	missing	missing	missing	missing	missing
11	acute pneumonia	880	830	1710	Organizing	Present	Present	Absent	Yes	Absent	Right empyema, pulmonary abscesses	450	Absent	None	Absent		2330	None	0	0-None-minimal	Absent	1-Mild	0-None	Sinusoidal dilation	210	220	Present	Absent		330	Present	some, partial preserv	Present	Present	Absent	Present	Present	Present	Absent
12	DAD, exudative phase			1500	Exudative	Present	Present	Present	Yes	Absent	microthrombi	580	Absent	Microscopic	Absent	Mild patchy fibrosis, Contraction bands in right ventricle	2050	None	0	2-Moderate	Absent	0-None-minimal	0-None		165	168	Present	Diffuse		300	Minimal	some, partial preserv	Absent	Present	Absent	present	Present	Absent	Absent					Prostatic adenocarcinoma
13	DAD, organizing phase	450	480	930	Organizing	Present	Absent	Absent	No	Absent	Right empyema	400	Absent	None	Absent		3200	None	0	1-Mild	Absent	1-Mild	0-None		215	167	Absent	Absent		201	Present	some, partial preserv	Absent	Present	Absent	Present	Present	Present	Absent				Reactive germinal centers in colon, pleura
14	acute bacterial bronchopneumonia	1840	1700	3540	Exudative	Present	Absent	Absent	No	Present		740	Absent	None	Absent		1830	Zonal	30	1-Mild	Absent	2-Moderate	4-Cirrhosis		360	280	Absent	Absent		300	Present	some, partial preserv	Absent	Present	Present	Absent	Absent	Present	Absent	Lymph node sinus histiocytosis
15	fungal pneumonia and sepsis	850	950	1800	Organizing	Present	Present	Present	No	Absent	Fungal infection	440	Absent	None	Present		1070	Zonal	40	1-Mild	Absent	0-None-minimal	0-None		180	150	Absent	Absent		250	Minimal	some, partial preserv	Absent	present	Present	Absent	Absent	Absent	Absent	Lymph node calcification				Pulmonary sarcoid (inactive), prostatic adenocarcinoma
16	DAD, exudative phase	800	1100	1900	Exudative	Absent	Present	Absent	No	Absent	Focal organizing DAD, honeycomb change	700	Absent	None	Present	Patchy fibrosis	2050	None	0	0-None-minimal	Absent	1-Mild	3-Bridging Fibrosis	Marked iron	160	146	Present	Diffuse and Nodular	Moderate to marked arteriosclerosis	350	Present	No	Absent	Present	Absent	Absent	Present	Absent	Absent	Lymph node sinus histiocytosis				Multiorgan hemosiderosis, prostatic adenocarcinoma
17	bilateral bronchopneumonia	1270	1300	2570	Not found	Present	Present	Absent	Yes	Absent	Bilateral empyema, pulmonary abscesses	400	Absent	None	Absent		2550	None	0	0-None-minimal	Absent	1-Mild	0-None		234	220	Present	Absent		550	Minimal	some, partial preserv	Absent	Present	some	Absent	Present	Absent	Absent
18	DAD, exudative phase	700	800	1500	Exudative	Present	Present	Absent	No	Present		550	Absent	None	Absent		1700	Zonal	10	0-None-minimal	Absent	1-Mild	4-Cirrhosis		140	140	Absent	Diffuse and Nodular		500	Present	some, partial preserv	Absent	Present	Absent	Present	Present	Absent	Absent					Severe aortic atherosclerosis; multinodular thyroid
19	sudden cardiac death	560	500	1060	Not found	Absent	Present	Absent	No	Absent		480	Absent	Large, fibrotic	Present	Old subendocardial myocardial infarction	2000	None	0	0-None-minimal	Absent	0-None-minimal	0-None		180	190	Absent	Absent		280	Present	some, partial preserv	Absent	Present	Absent	Present	Present	Absent	Absent
20	DAD, proliferative and fibrosing phase	700	750	1450	Fibrosing	Present	Present	Absent	No	Absent	Right empyema	650	Absent	None	Absent	pericardial fibrosis	3100	Zonal	70	0-None-minimal	Absent	1-Mild	0-None		250	220	Absent	Absent		460	Minimal	some, partial preserv	Absent	Present	some	Absent	Absent	Absent	Absent	Splenic plasmacytosis; Lymph node sinus histiocytosis
21	DAD, exudative phase	750	700	1450	Exudative	Absent	Absent	Present	No	Present		700	Absent	Large, fibrotic	Present	CABG, old infarction with subendocardial scarring in right ventricle, aortic valve stenosis	1450	None	0	0-None-minimal	Absent	0-None-minimal	1-PP or PSF		135	170	Present	Diffuse	Moderate to marked arteriosclerosis	460	Minimal	some, partial preserv	Absent	Present	some	Absent	Absent	Present	Absent	Lymph node sinus histiocytosis				Abdominal aortic aneurysm, Barrett's esophagus
22	DAD/ARDS	950	985	1935	Exudative	Absent	Present	Absent	No	Present		565	Absent	None	Absent		2500	None	0	0-None-minimal	Absent	1-Mild	0-None		Missing	Missing	Absent	Absent		175	Minimal	some, partial preserv	Absent	Present	some	Absent	Present	absent	Present
23	pulmonary hemorrhage	800	750	1550	Organizing	Absent	Absent	Present	No	Absent	Organizing pneumonia	450	Absent	None	Absent		1000	Zonal	30	1-Mild	Absent	0-None-minimal	0-None		120	110	Absent	Absent	Moderate arteriosclerosis	100	Minimal	some, partial preserv	Absent	Present	missing	missing	missing	missing	missing					Prostatic adenocarcinoma, Abdominal aortic aneurysm
24	acute pneumonia	650	860	1510	Exudative	Present	Present	Absent	No	Present		400	Absent	None	Present		1350	None	0	1-Mild	Absent	0-None-minimal	0-None		260	200	Absent	Absent	Arterionephrosclerosis with moderate tubular atrophy and interstitial fibrosis	92	Minimal	some, partial preserv	Absent	Present	Absent	Absent	Present	Absent	Absent	cellular red pulp				Follicular adenoma
25	DAD, acute phase	590	1080	1670	Exudative	Present	Present	Absent	No	Present		400	Absent	None	Present	Mild patchy fibrosis	980	None	0	0-None-minimal	Absent	1-Mild	0-None	sinusoidal dilation	116	118	Absent	Absent	Moderate arteriosclerosis	105	Minimal	some, partial preserv	Absent	Absent	Absent	present	Present	Present	Absent
26	cerebral hemorrahge	830	840	1670	Organizing	Absent	Absent	Absent	No	Absent		305	Absent	None	Absent		2150	None	0	1-Mild	Present	1-Mild	1-PP or PSF		167	152	Absent	Absent		380	Minimal	some, partial preserv	Absent	Absent	Absent	Present	Present	Present	Absent	cellular red pulp
27	bronchopneumonia and DAD, exudative phase	560	637	1197	Exudative	Present	Present	Absent	No	Absent		500	Absent	Large, fibrotic	Present	aortic valve replacement, Old infarction with subendocardial fibrosis	996	None	0	0-None-minimal	Absent	0-None-minimal	1-PP or PSF	Almost bridging fibrosis	80	531	Present	Absent	Moderate arteriosclerosis	125	Minimal	some, partial preserv	Absent	Present	Absent	Absent	Present	Absent	Absent	cellular red pulp				Renal hilar lipoma
28	pulmonary thromboembolic disease in the setting of DAD, exudative phase	607	699	1306	Organizing	Absent	Present	Present	Yes	Absent		430	Absent	None	Absent	Patchy fibrosis	1550	None	0	1-Mild	Absent	0-None-minimal	0-None	sinusoidal dilation	160	150	Absent	Absent		248	Minimal	some, partial preserv	Absent	Absent	Absent	present	Present	Absent	Absent					Adrenal nodular hyperplasia
29	herpetic tracheobronchitis and DAD, s/p bilateral lung transplantation	1073	913	1986	Organizing	Absent	Absent	Present	No	Absent	Explanted lung findings in table, transplanted lungs show herpetic tracheobronchitis and diffuse alveolar damage	500	Present	None	Present	pericardial fibrosis and inflammation, fibrinous pericarditis	1560	Zonal	90	1-Mild	Absent	0-None-minimal	0-None	hepatic infarcts, fibrin microthrombi	170	160	Absent	Absent	Fibrin microthrombi, changes of thrombotic microangiopathy	580	Absent	Yes	Absent	Present	Absent	Present	Present	Absent	Absent
30	bacterial pneumonia, SARS-CoV-2 infection	670	700	1370	Organizing	Present	Absent	Absent	No	Absent		490	Absent	None	Present	Calcification of small vessels, mural calcifications in heart	650	None	0	0-None-minimal	Absent	0-None-minimal	1-PP or PSF		6	6.5	N/A	N/A	Complete atrophy with marked calcification	205	Minimal	some, partial preserv	Absent	Present	Present	Absent	Absent	Absent	Absent	Lymph node sinus histiocytosis			Dermal/epidermal necrosis of left great toe	Secondary hyperparathyroidism with systemic dystrophic calcifications
31	bacterial pneumonia	910	930	1840	Organizing	Present	Present	Absent	Yes	Absent	Pulmonary infarcts	440	Absent	None	Present	patchy subendocardial fibrosis	1950	Zonal	5	1-Mild	Absent	1-Mild	0-None		155	160	Present	Diffuse and Nodular	Mild tubular atrophy and interstitial fibrosis	222	Minimal	some, partial preserv	Absent	Present	Absent	present	Present	Present	Absent	cellular red pulp
32	right heart failure	600	550	1150	Not found	Absent	Present	Present	No	Present	Interstitial fibrosis	800	Absent	Microscopic	Absent	Subendocardial myocardial necrosis in right ventricle	1150	None	0	0-None-minimal	Absent	1-Mild	3-Bridging Fibrosis	Multiple bile duct hamartomas	100	100	Absent	Absent	Severe tubular atrophy and interstitial fibrosis	155	Minimal	some, partial preserv	Absent	Present	absent	Absent	Absent	Present	Absent	Lymph node sinus histiocytosis
33	bacterial pneumonia	790	810	1600	Fibrosing	Present	Present	Present	No	Absent	Cystic remodeling	500	Absent	None	Absent		1450	None	0	2-Moderate	Absent	0-None-minimal	0-None		106	120	Absent	Absent	Nephrolithiasis, Mild tubular atrophy and interstitial fibrosis	114	Present	some, partial preserv	Absent	present	Absent	Absent	Present	Present	Absent		1400	No pathological findings
34	DAD, organizing to fibrosing phase	500	400	900	Fibrosing	Absent	Absent	Absent	No	Absent	Anthro-silicotic nodules	490	Absent	None	Absent	Cardiac amyloidosis	1230	None	0	0-None-minimal	Absent	0-None-minimal	0-None		123	117	Absent	Diffuse and Nodular	Moderate arteriosclerosis	144	Minimal	some, partial preserv	Absent	present	Absent	Absent	Present	Present	Absent	Splenic extramedullary hematopoiesis
35	DAD, organizing phase	1000	1200	2200	Organizing	Absent	Present	Present	No	Absent		630	Absent	None	Absent	Dilated cardiomyopathy	2500	Zonal	30	0-None-minimal	Absent	1-Mild	0-None		370	340	Present	Absent	mild interstitial inflammation	290	Present	some, partial preserv	Absent	Present	Absent	Present	Present	Present	Absent		1350	Focal subarachnoid and cortical hemorrhage, Purkinje cell loss, Capillary congestion	Retroperitoneal hemorrhages	Colloid nodular disease
36	acute cerebral ischemia with tonsillar herniation	180	180	360	Not found	Present	Present	Present	No	Absent		126	Absent	None	Absent		900	None	0	0-None-minimal	Absent	0-None-minimal	0-None		110	110	Present	Absent		80	Present	Yes	Absent	Present	Absent	Present	Present	Absent	Absent		1040	Diffuse hypoxic/ischemic injury, Tonsillar herniation, Diffuse axonal injury
37	bronchopneumonia	850	800	1650	Not found	Present	Present	Absent	No	Present		600	Absent	Large, fibrotic	Present	Subendocardial myocardial fibrosis, Left ventricle and septum	1350	None	0	2-Moderate	Absent	2-Moderate	3-Bridging Fibrosis		157	147	Present	Diffuse		98	Minimal	some, partial preserv	Absent	Present	Absent	Absent	Present	Absent	Absent	Spleen with capsular fibrosis, sclerotic nodes	1050	Remote pontine infarcts
38	bronchopneumonia	1000	950	1950	Exudative	Present	Present	Absent	Yes	Absent	Pulmonary infarcts	800	Absent	Microscopic	Present	Contraction band necrosis in left ventricle	600	None	0	1-Mild	Absent	1-Mild	0-None		400	380	Absent	Absent		500	Minimal	some, partial preserv	Present	Present	Absent	Present	Present	Present	Absent		1300	No pathological findings
39	DAD, organizing to fibrosing phase and multiple pulmonary infarcts	950	1300	2250	Organizing	Present	Present	Present	Yes	Absent	Pulmonary infarcts	600	Absent	None	Absent		4000	None	0	1-Mild	Absent	1-Mild	0-None		250	250	Present	Absent		475	Present	some, partial preserv	Absent	Present	Absent	Present	Present	Absent	Absent	lymph node partially infarcted	1350	Diffuse hypoxic/ischemic injury, Congestion
40	sepsis with signs of cardiac dysfunction in the setting of DAD, proliferative and fibrotic phase	660	810	1470	Fibrosing	Present	Absent	Present	No	Absent		600	Present	None	Absent	Tricuspid valve thrombic vegetation, minimal infiltrate of lymphocytes, neutrophils in right ventricle	1670	Zonal	30	0-None-minimal	Absent	1-Mild	0-None		200	140	Absent	Absent	Arterionephrosclerosis	230	Minimal	some, partial preserv	Absent	present	missing	missing	missing	missing	missing		1370	Congestion		Follicular adenoma
41	DAD, proliferative and fibrosing phase	600	750	1350	Fibrosing	Absent	Absent	Absent	No	Absent		300	Absent	None	Absent		1615	None	0	1-Mild	Present	1-Mild	3-Bridging Fibrosis		175	183	Present	Diffuse		157	Minimal	some, partial preserv	Absent	Present	Absent	Present	Present	Present	Absent	cellular red pulp	1200	Alzheimer disease, congestion
42	massive hepatic necrosis, s/p liver transplant	640	910	1550	Not found	Absent	Absent	Absent	No	Absent		700	Absent	None	Absent	CABG		Azonal	80	0-None-minimal	Absent	0-None-minimal	0-None	transplant liver with biliomas, abscesses, marked cholestasis	320	350	Present	Absent	Mild tubular atrophy and interstitial fibrosis	500	Absent	Yes	Absent	Present	Absent	Present	Present	Absent	Absent	cellular red pulp	1475	Focal subarachnoid hemorrhage, Focal hypoxic/ischemic injury		Acute pancreatitis
43	DAD, exudative and proliferative phase	910	800	1710	Exudative	Present	Present	Absent	No	Absent		500	Absent	None	Present		2250	None	0	2-Moderate	Present	2-Moderate	4-Cirrhosis		191	158	Absent	Absent	Mild tubular atrophy and interstitial fibrosis	240	Minimal	some, partial preserv	Absent	Present	missing	missing	missing	missing	missing		1150	Congestion, Cerebellar hypoxic/ischemic changes	Esophagitis
44	bacterial pneumonia superimposed on DAD, fribrosing stage	700	700	1400	Fibrosing	Present	Absent	Absent	Yes	Absent		450	Present	None	Absent	small clusters of lymphocytes without necrosis	2700	None	0	0-None-minimal	Absent	0-None-minimal	0-None	Extramedullary hematopoiesis	250	250	Absent	Absent		670	Minimal	some, Partial preserv	Absent	present	Absent	Present	Present	Present	Absent	Splenic extramedullary hematopoeisis	1400	No pathological findings
Comment sections contain additional information or clarifications and do not represent the results of systematic review.
Abbreviations: DAD: Diffuse alveolar damage; PP: Periportal fibrosis; PSF: Pericentral fibrosis; CAD: Coronary artery disease; CABG: coronary artery bypass grafts; LN: Lymph node; Wt: Weight
NASH CRN Liver fibrosis staging reference: Kleiner DE, Brunt EM, Van Natta M, Behling C, Contos MJ, Cummings OW, Ferrell LD, et al. Design and validation of a histological scoring system for nonalcoholic fatty liver disease. Hepatology 2005;41:1313-1321.
